# Supplementary material
Source: PubMed Central journal article supplement (PMC4844191)

Blots for Fig.1a

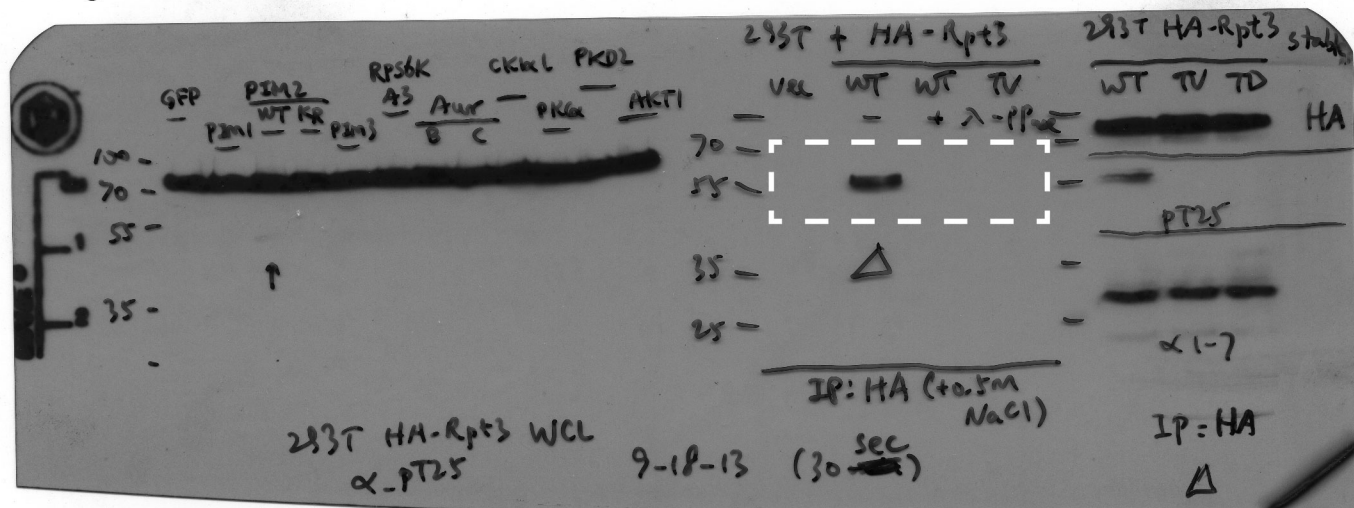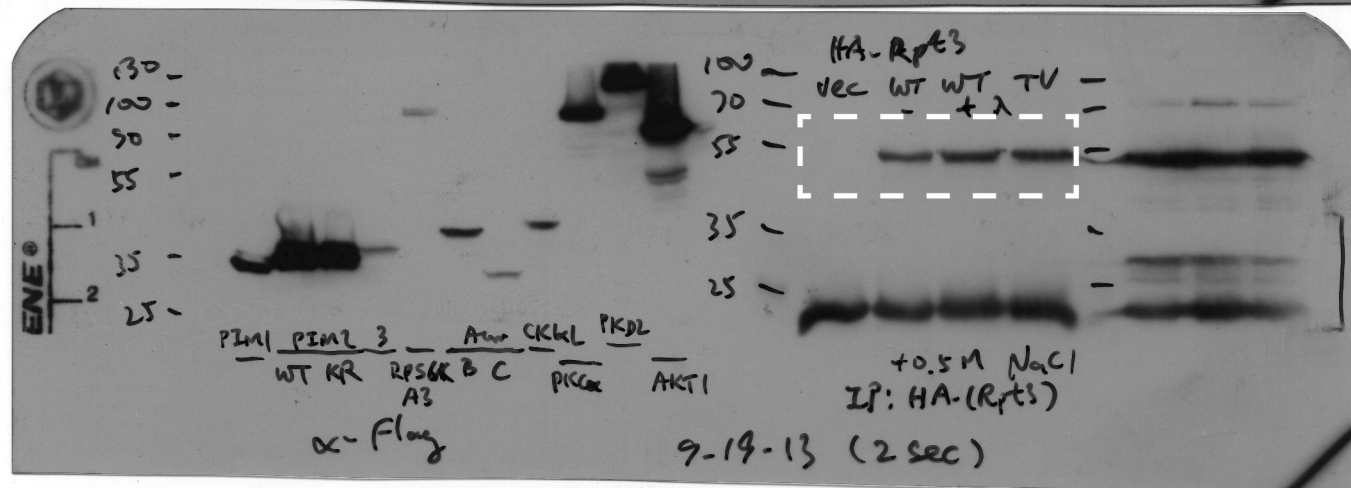

Blots for Fig. 1b

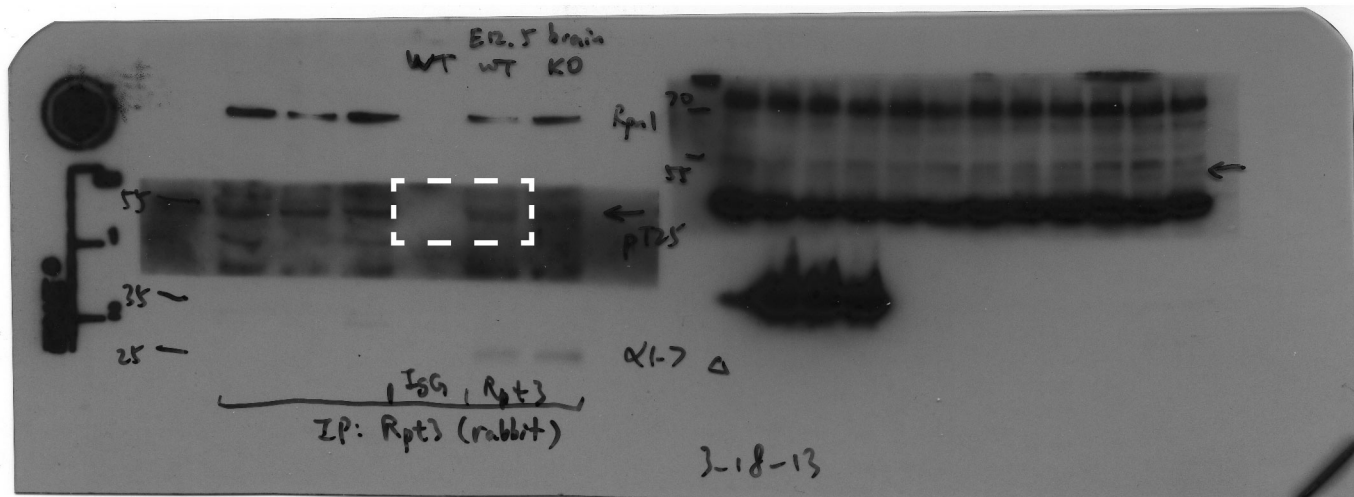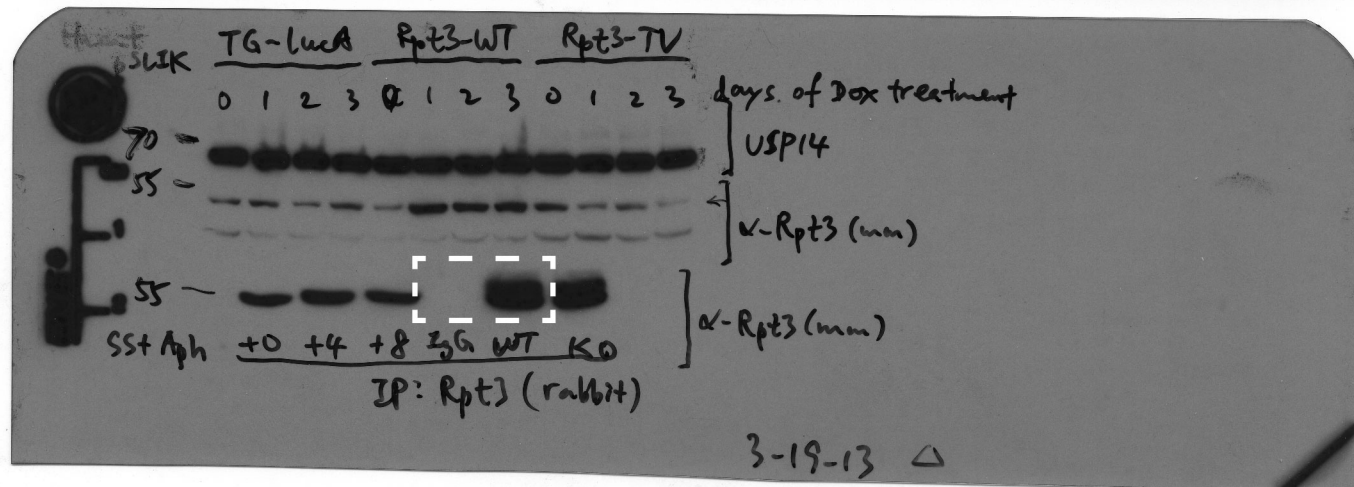

Blots for Fig. 1c

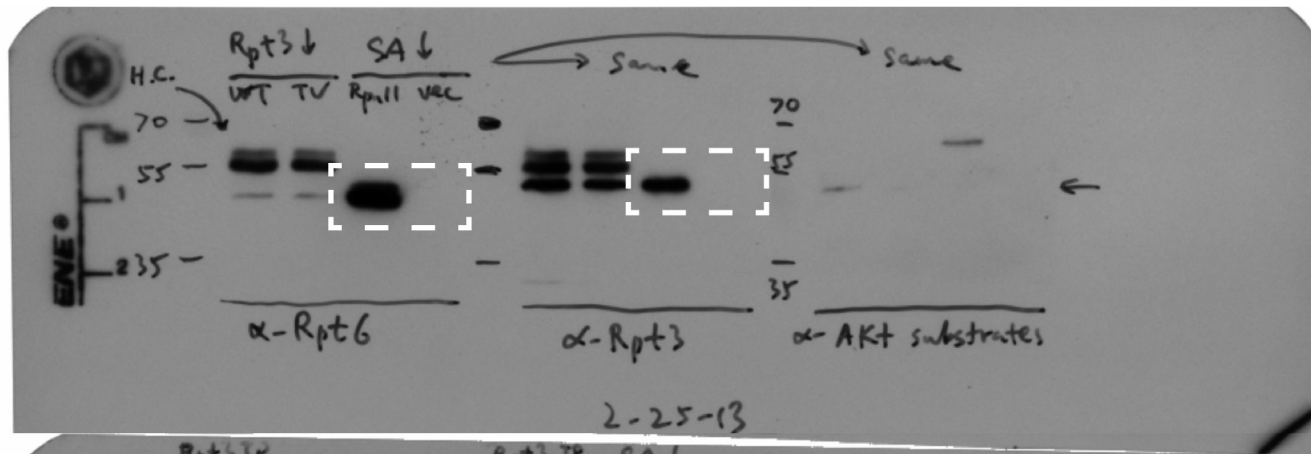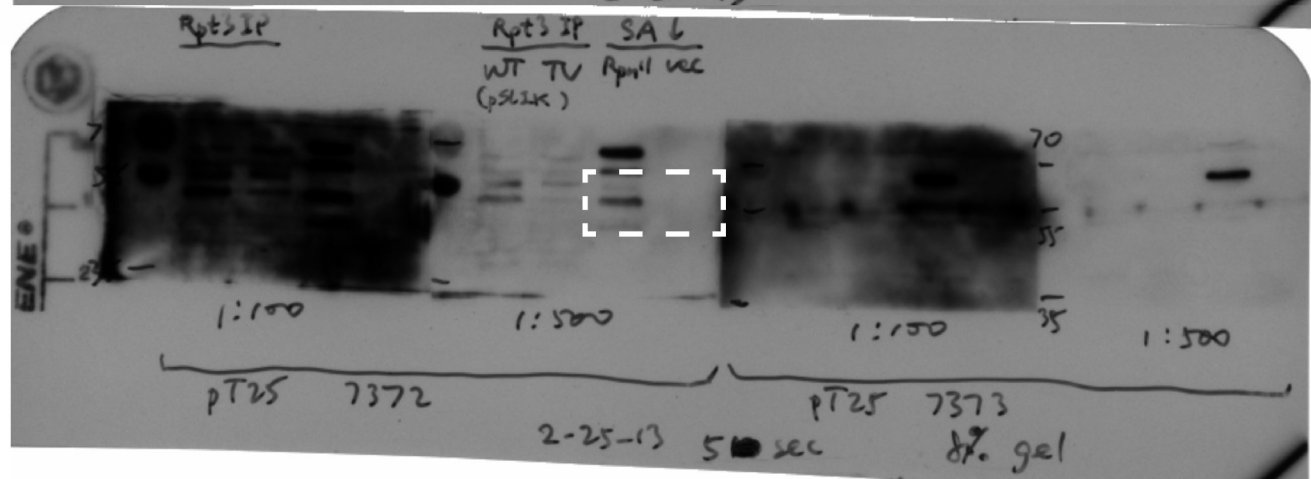

Blots for Fig.1d

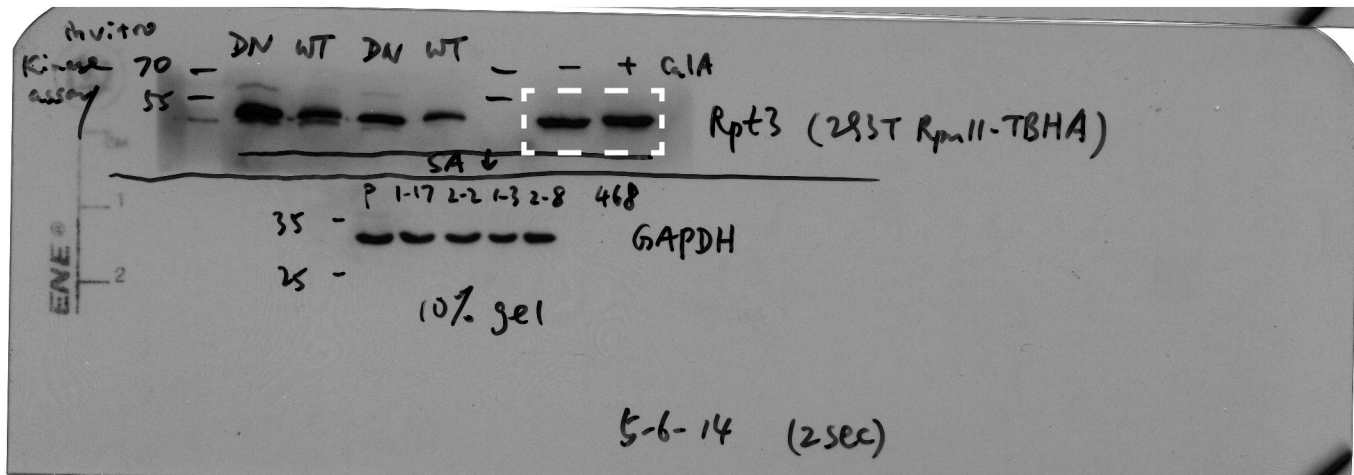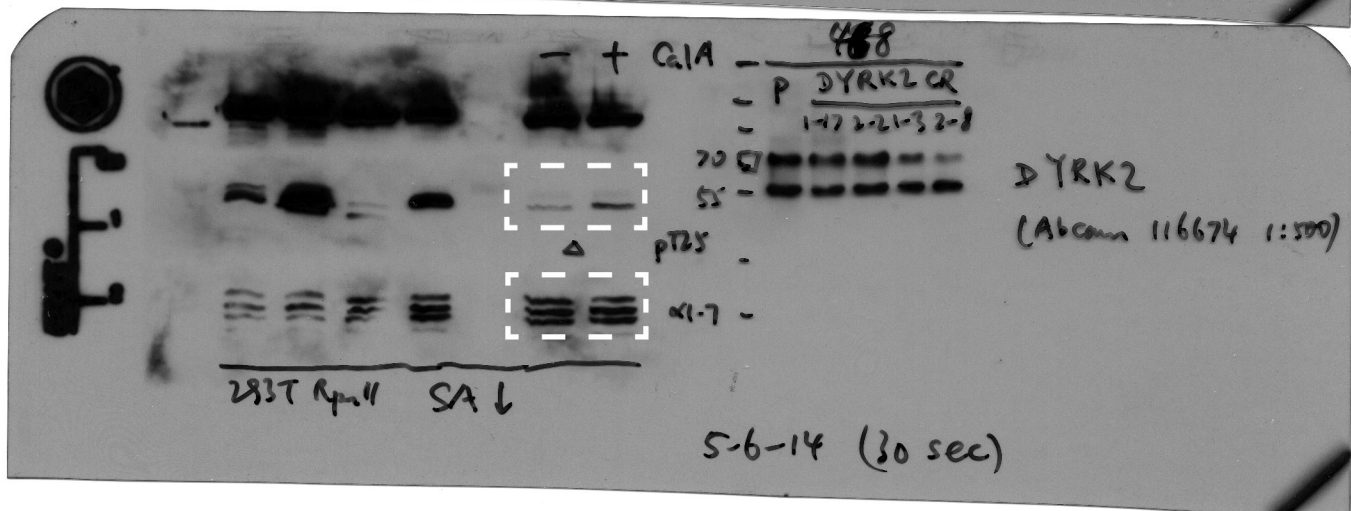

Blots for Fig.1e

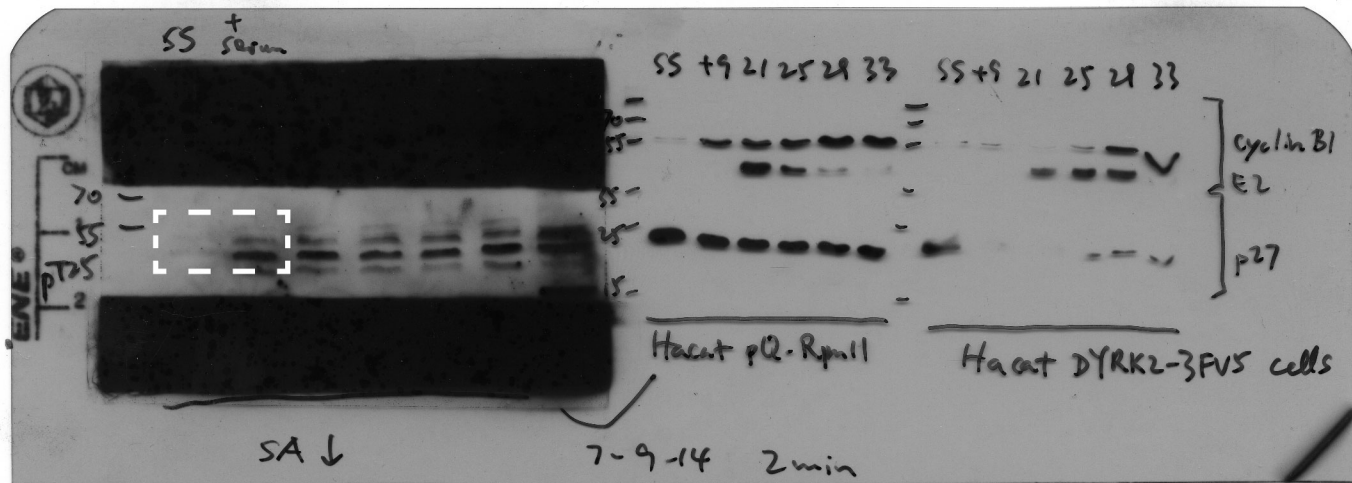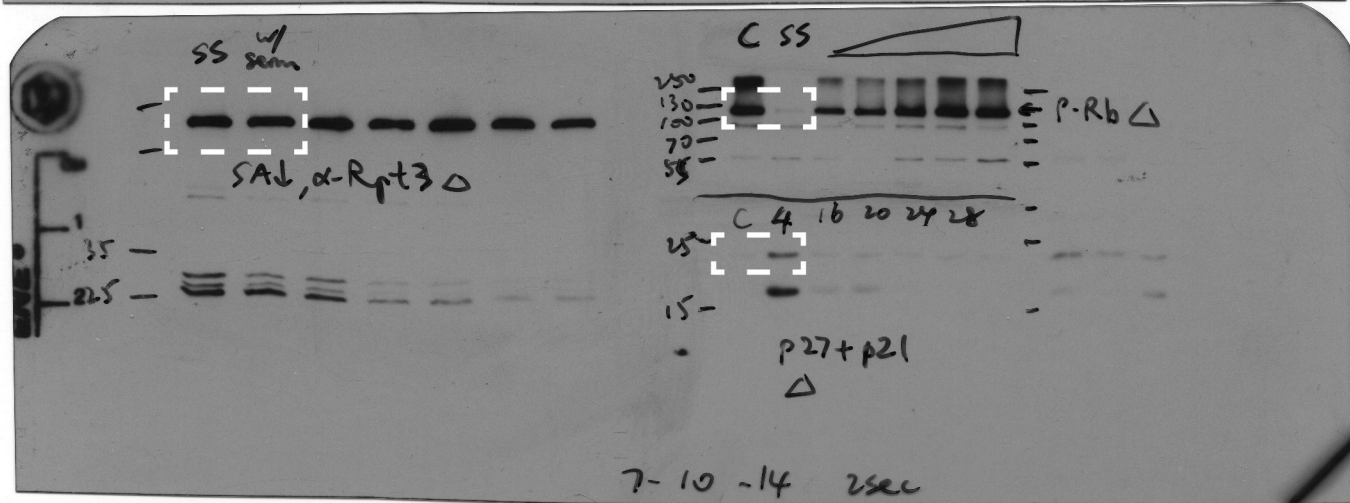

Blots for Fig.1f

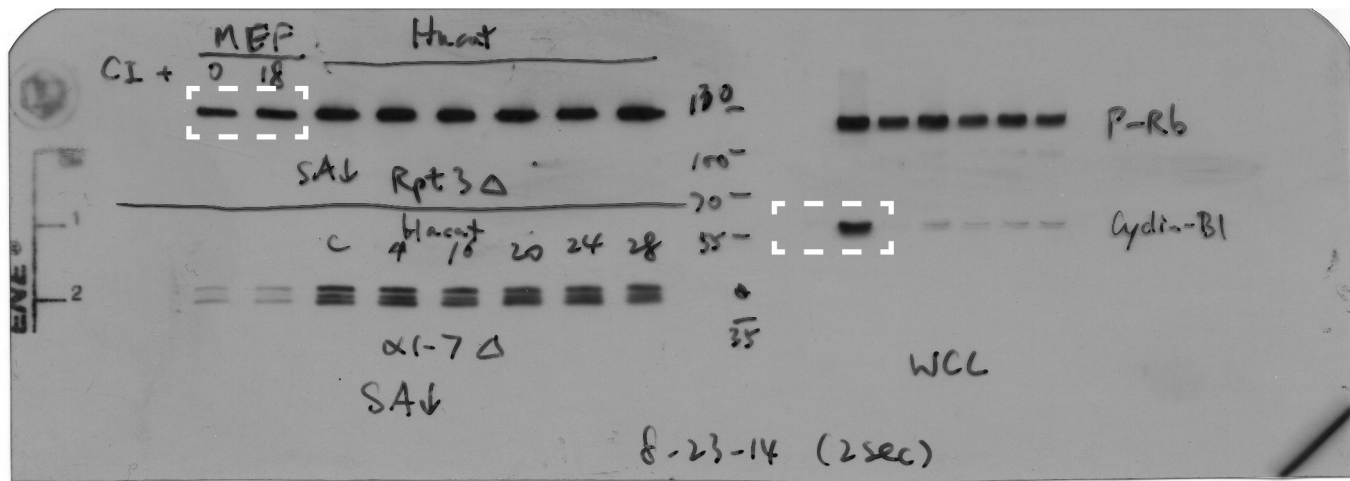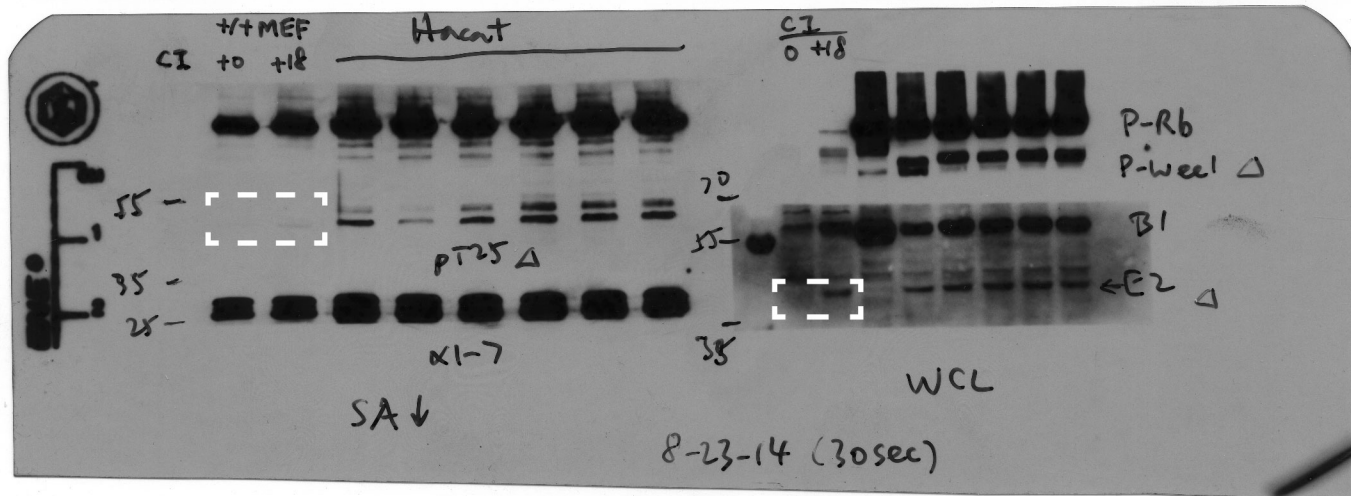

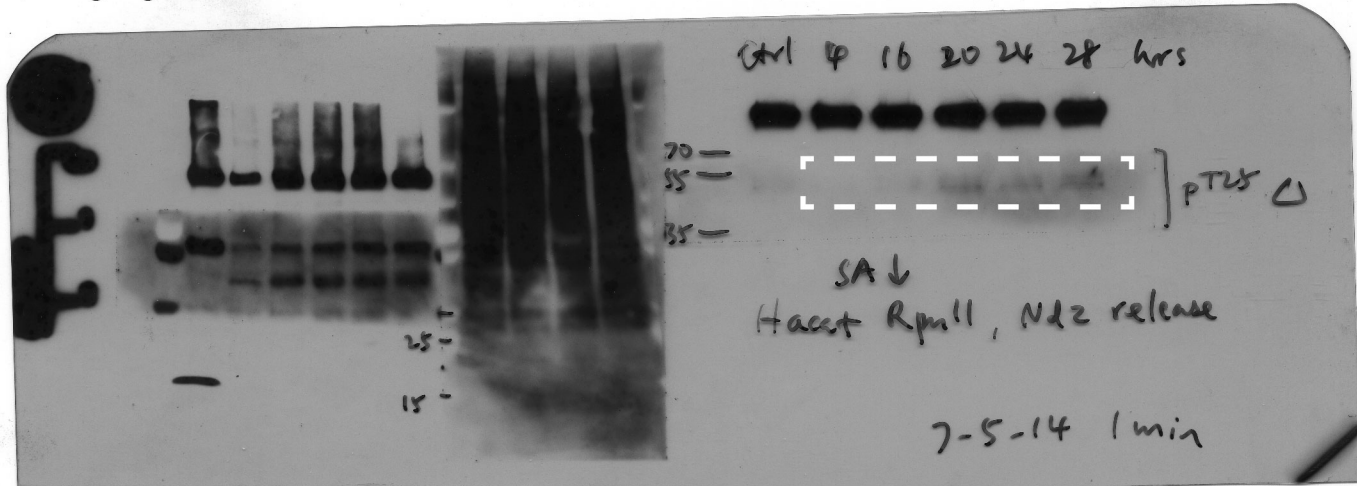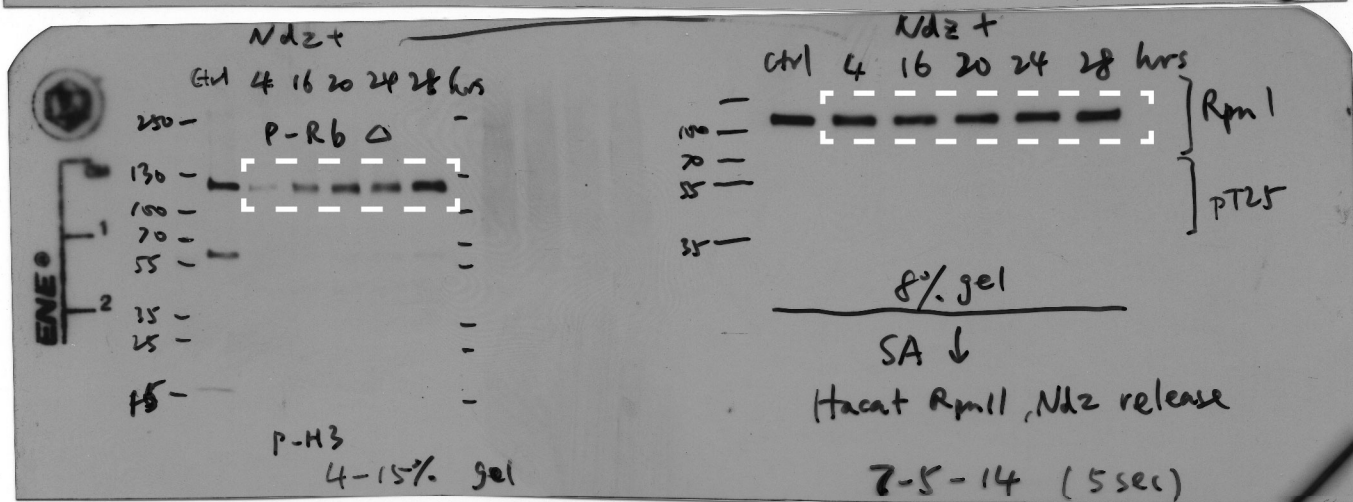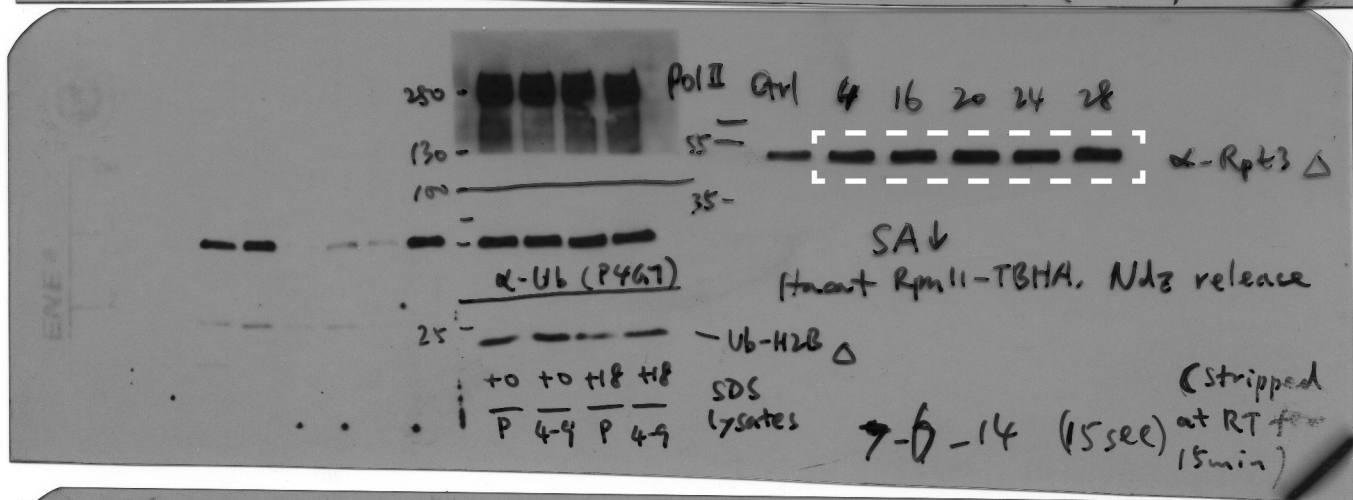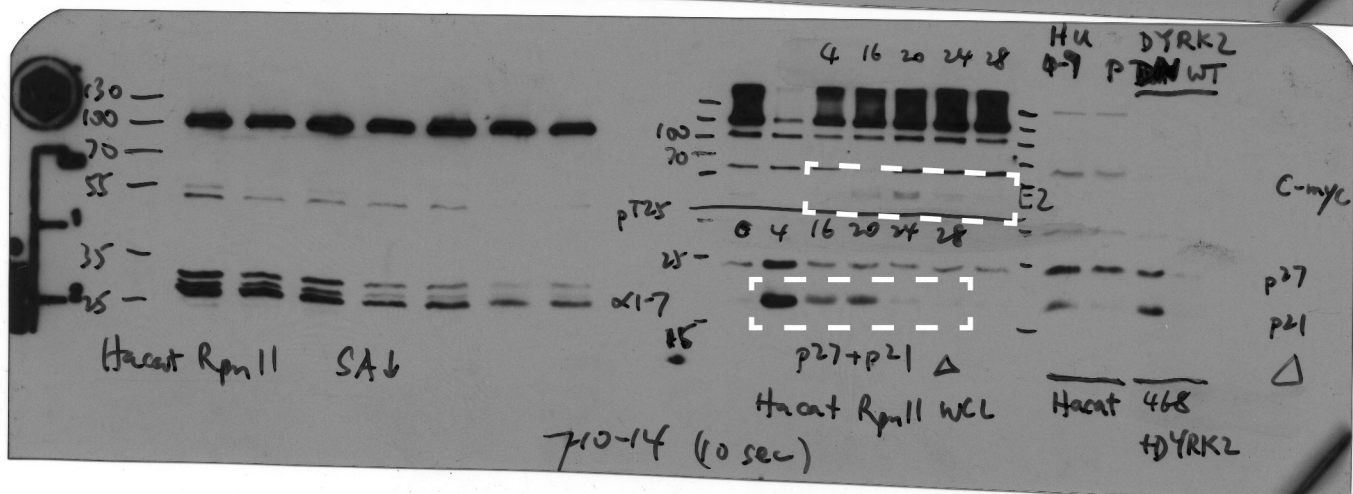

Blots for Fig.2b

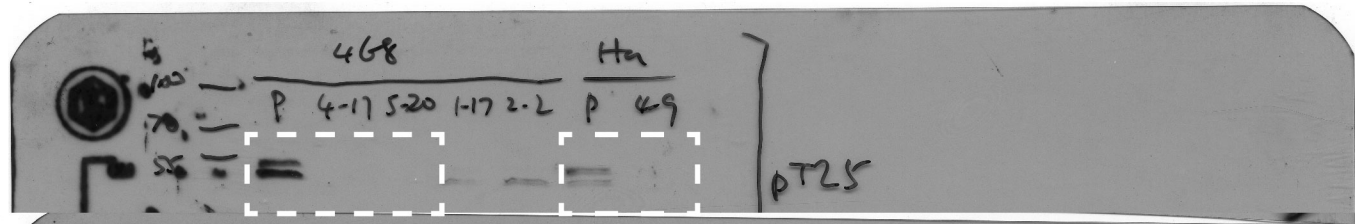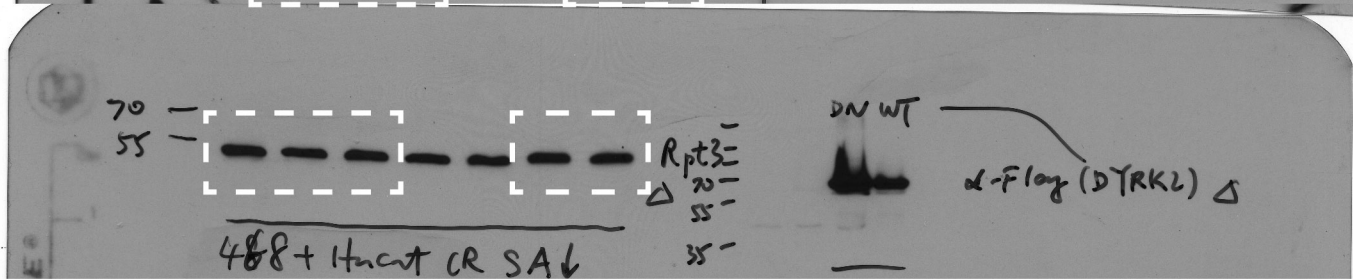



Blots for Fig.2d

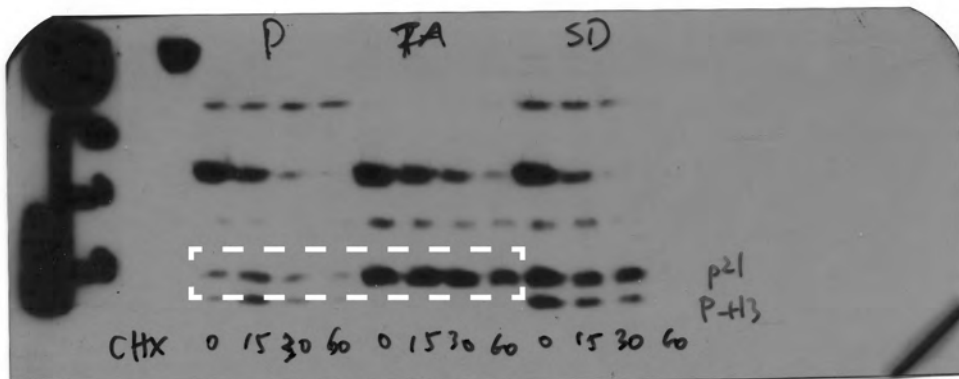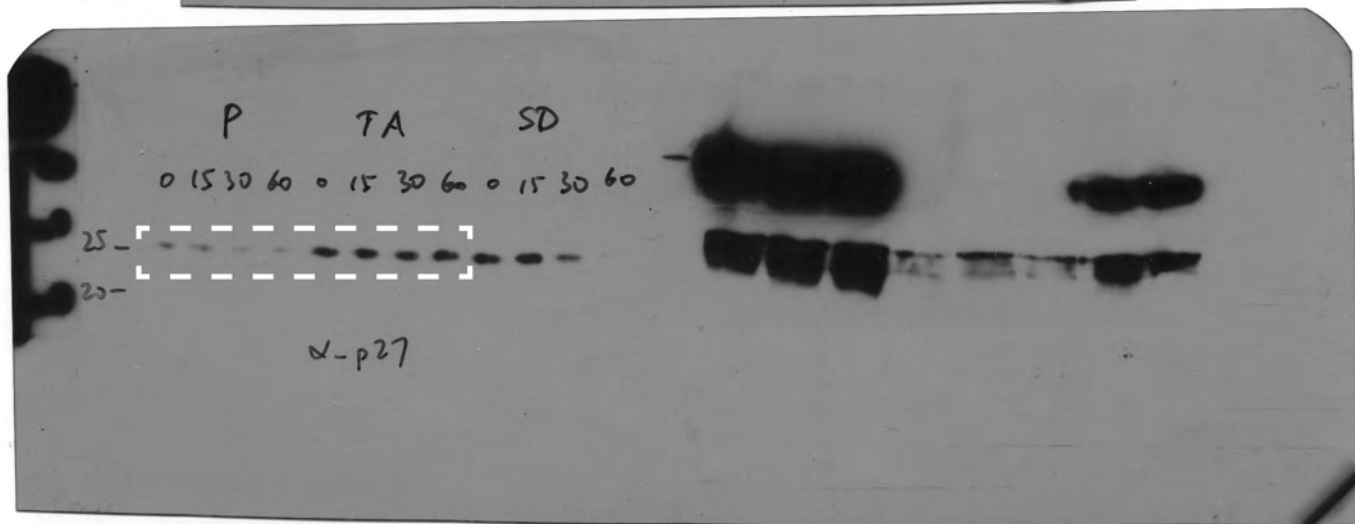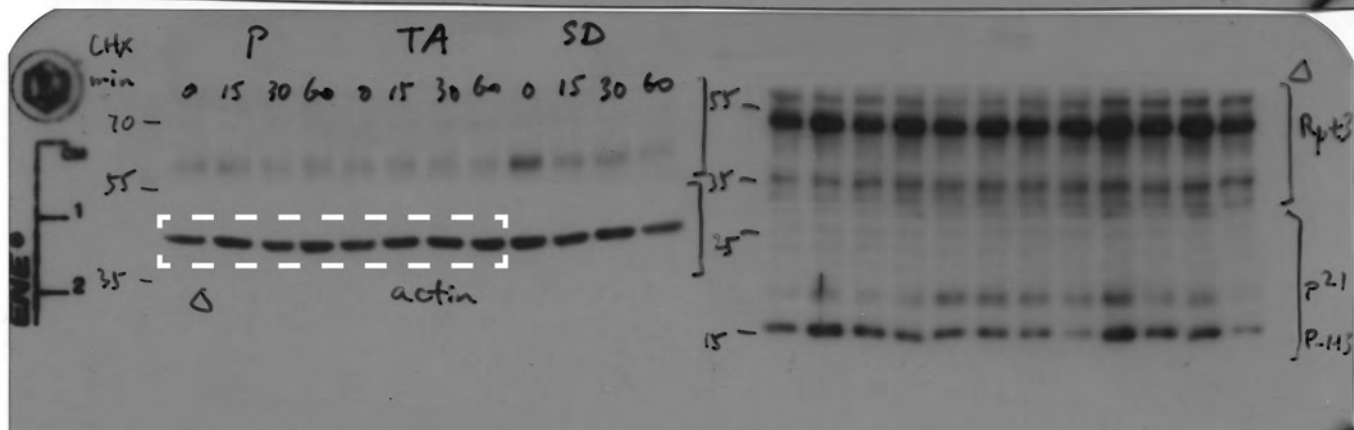

Blots for Fig.2f

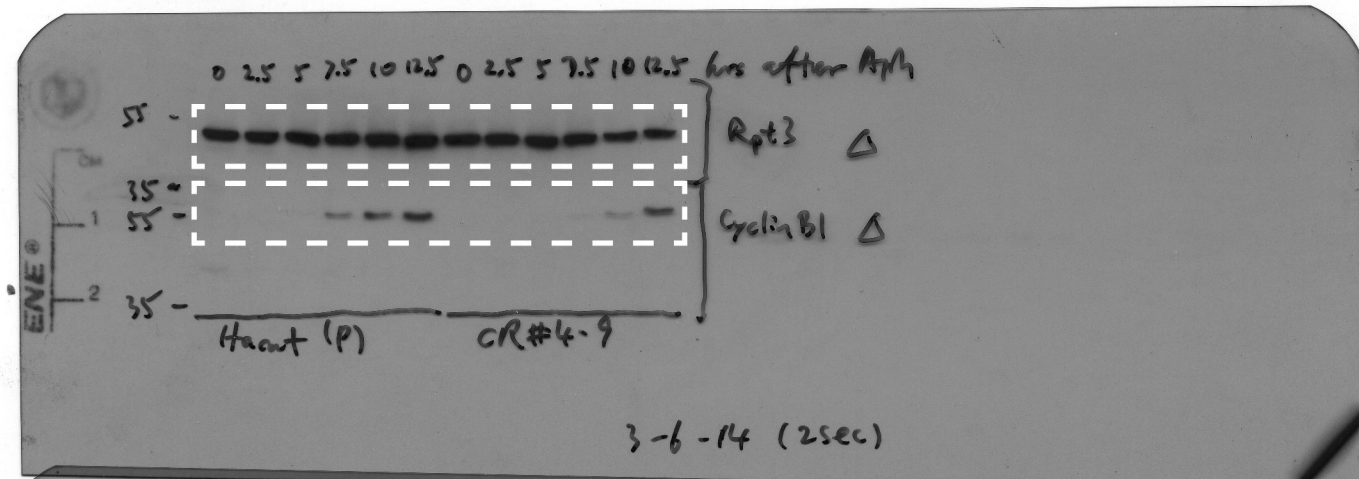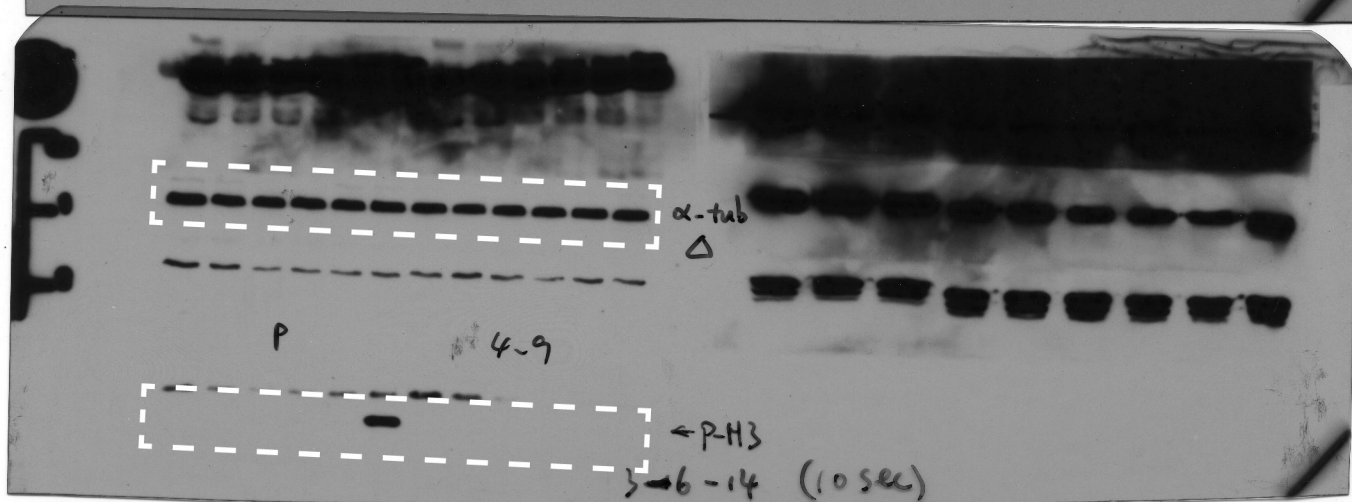

Blots for Fig.3c

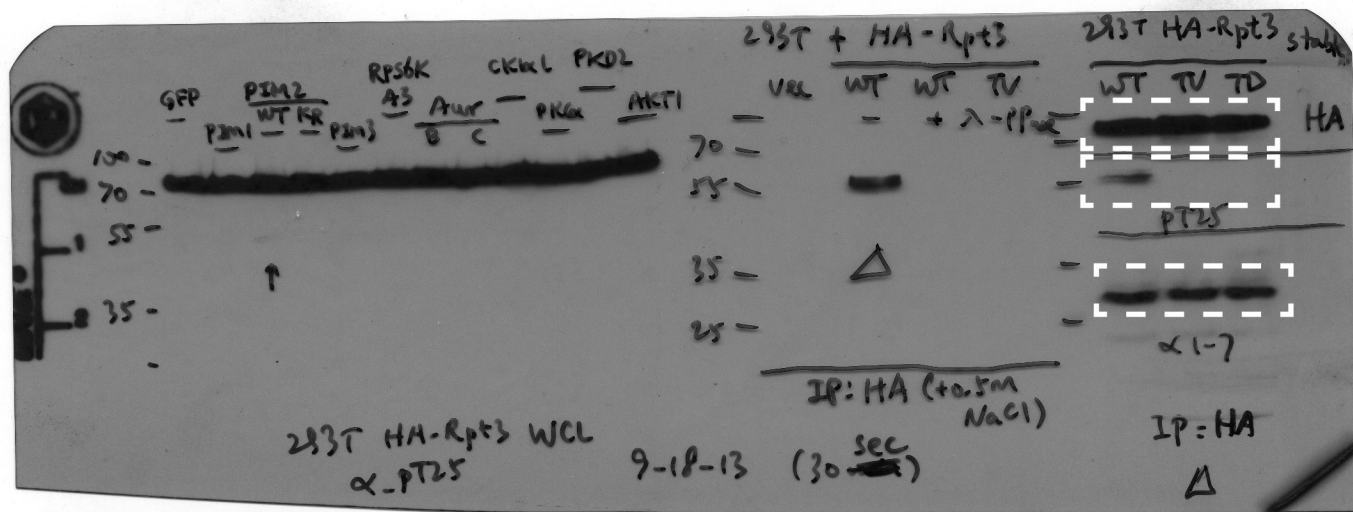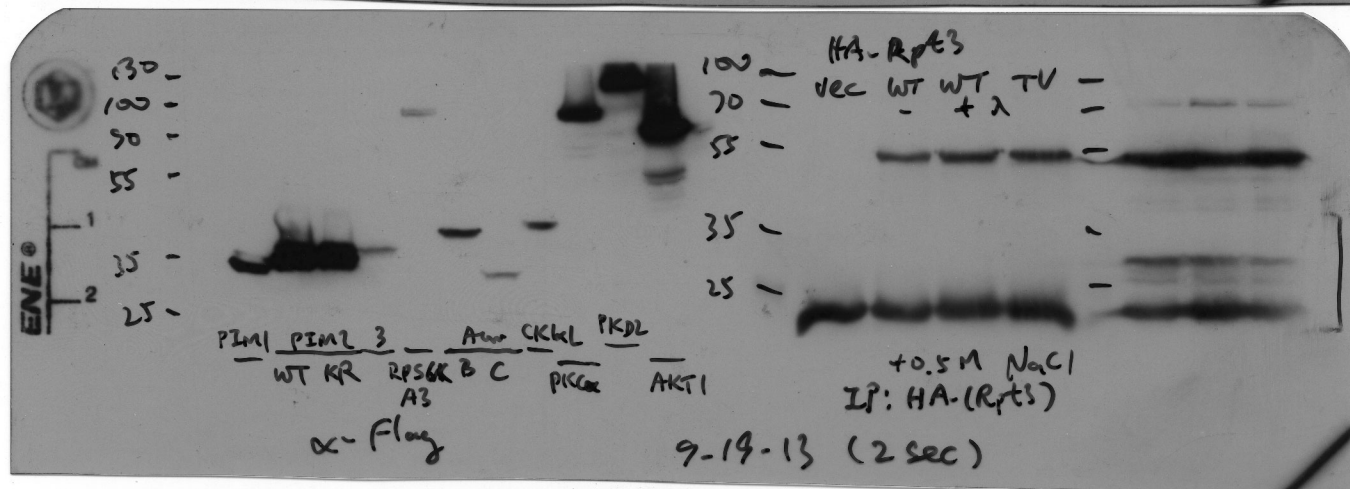

Blots for Fig.3d

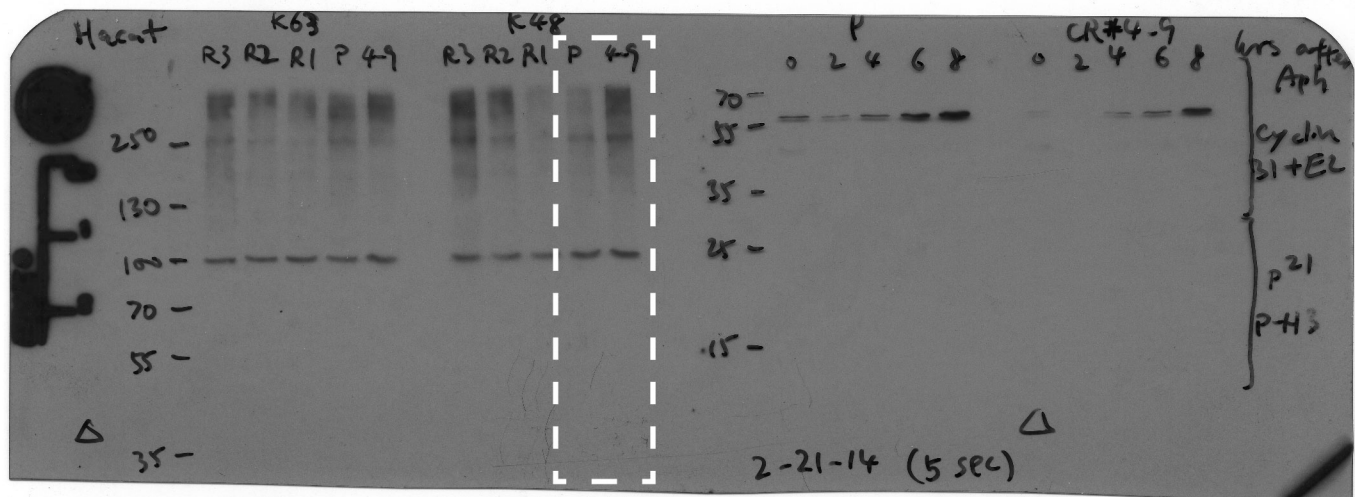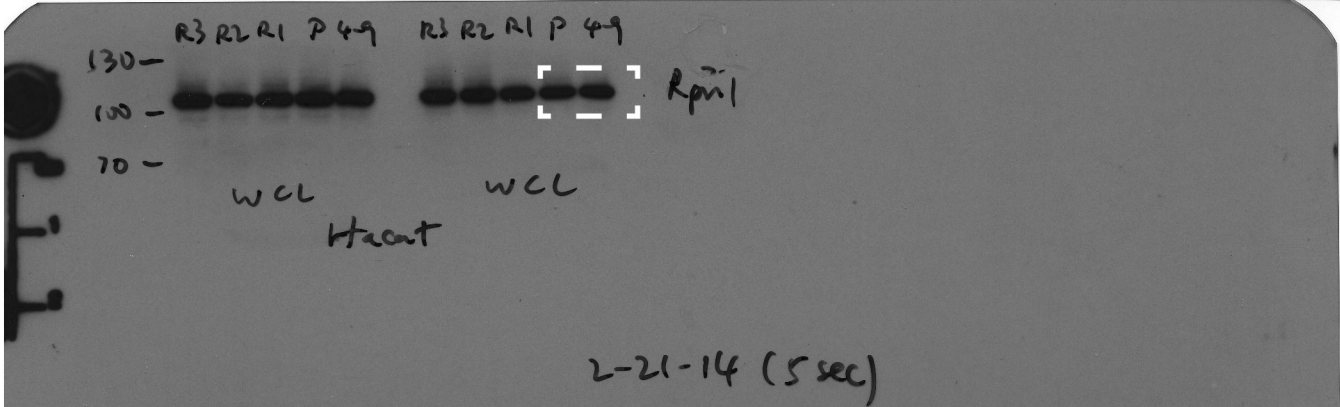

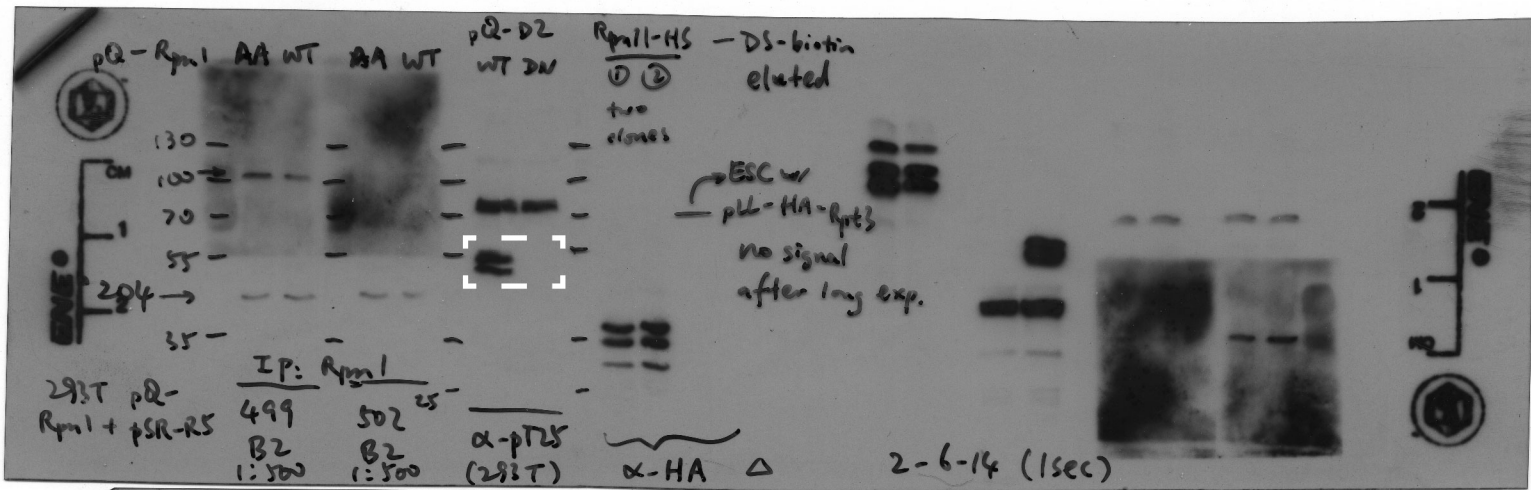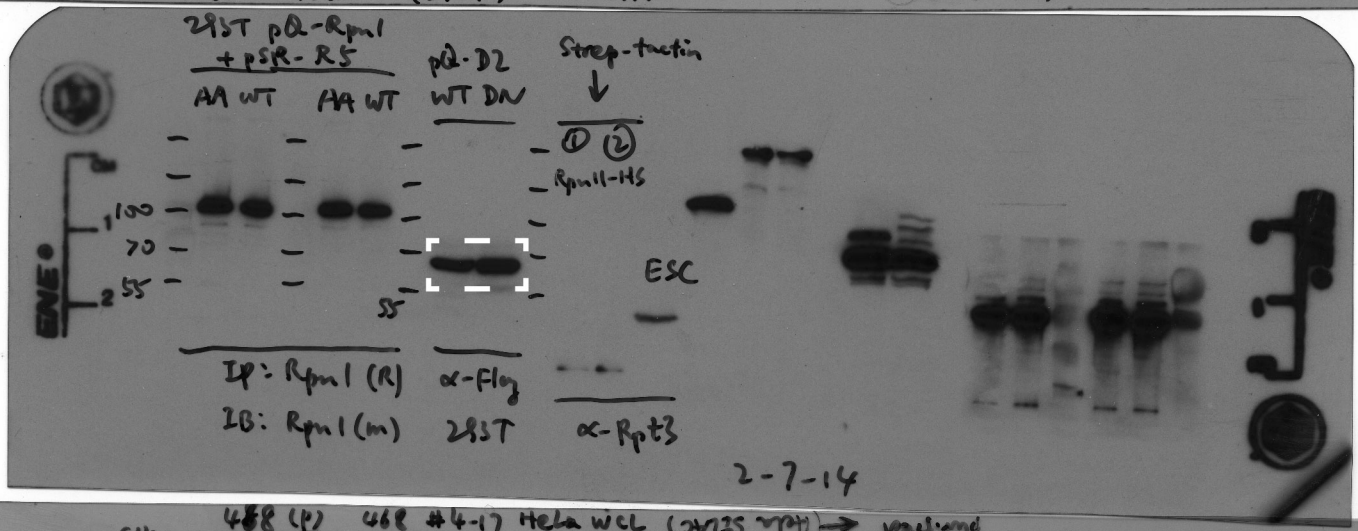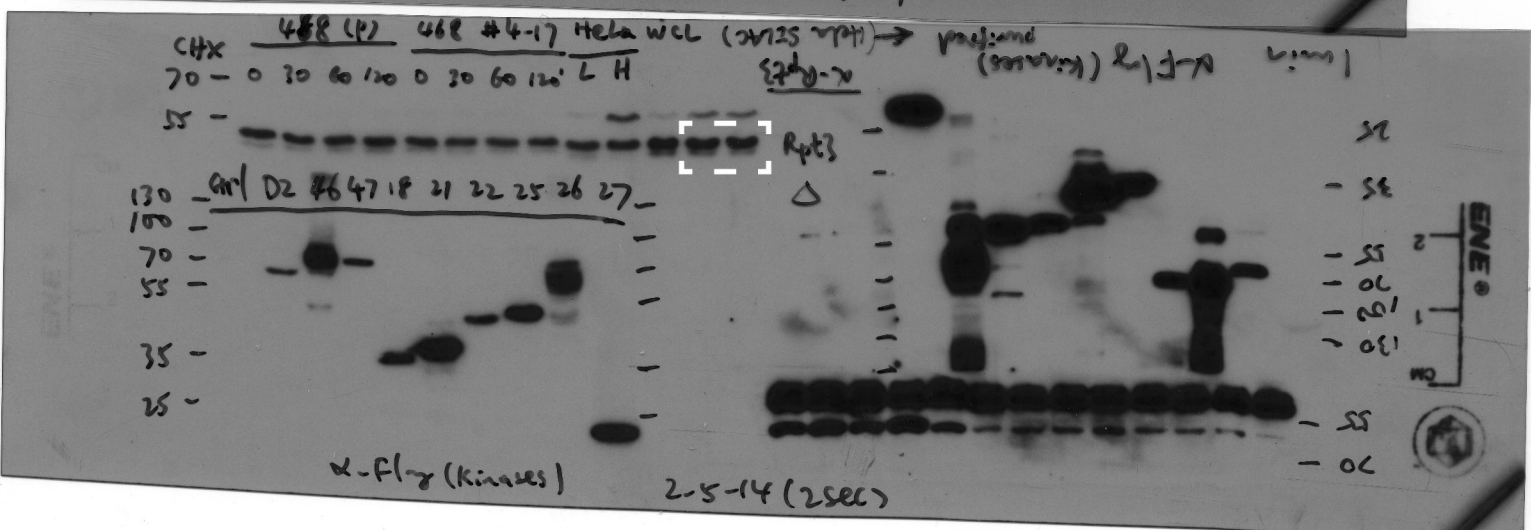

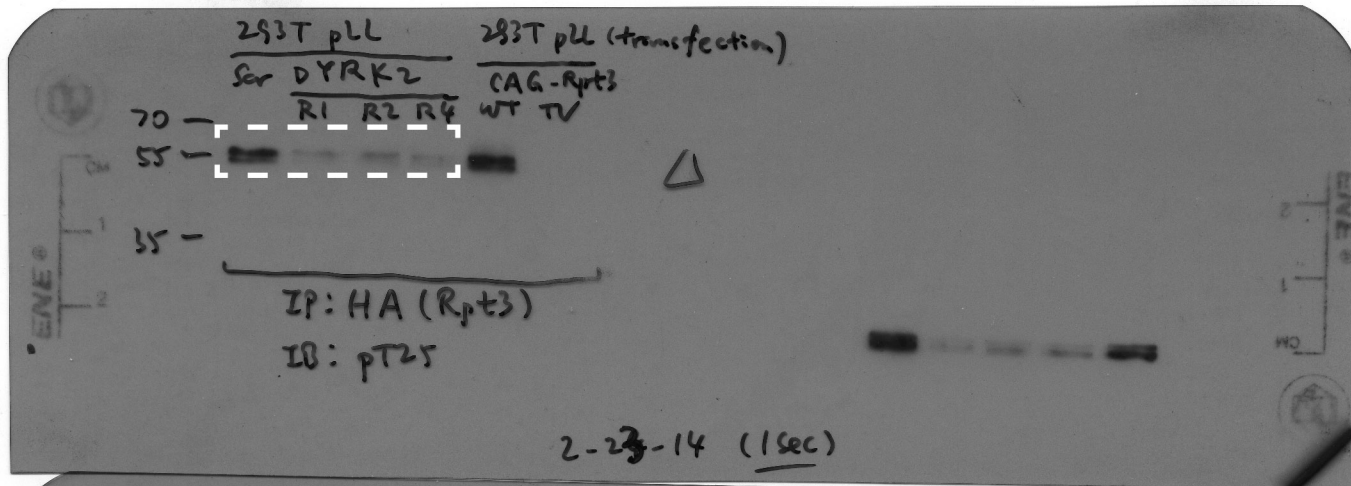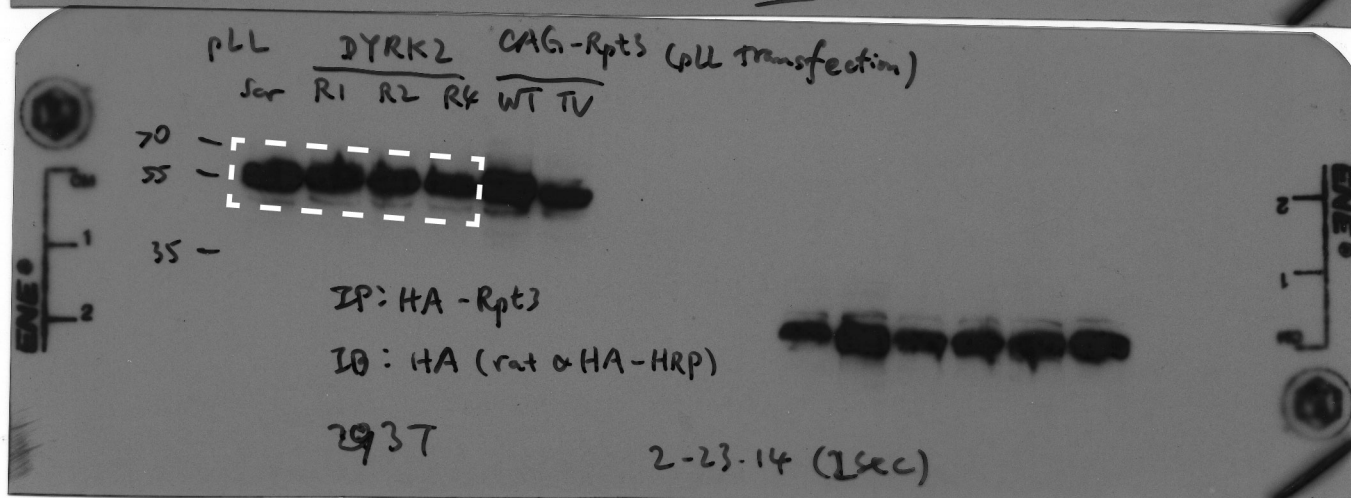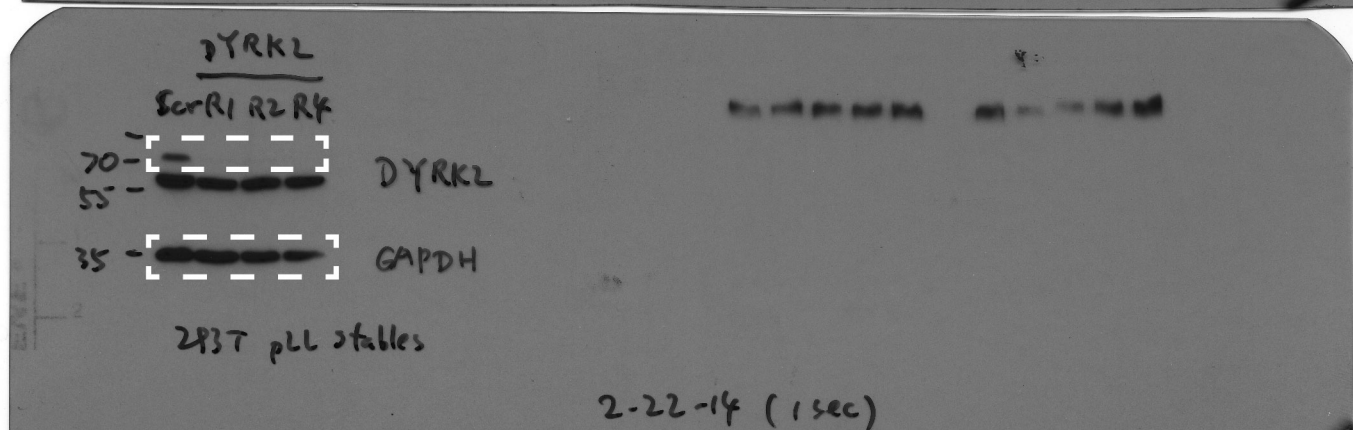

Blots for Fig.4e

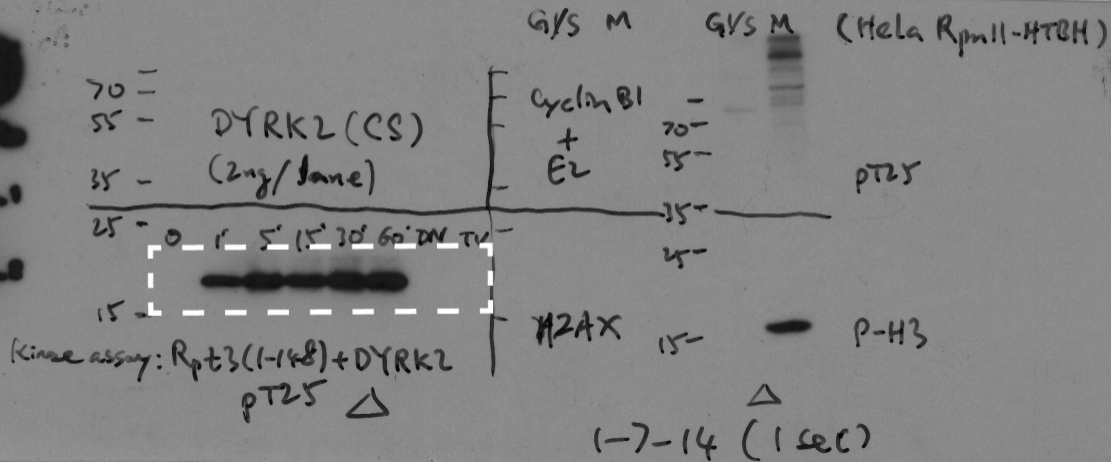

Blots for Fig.5b

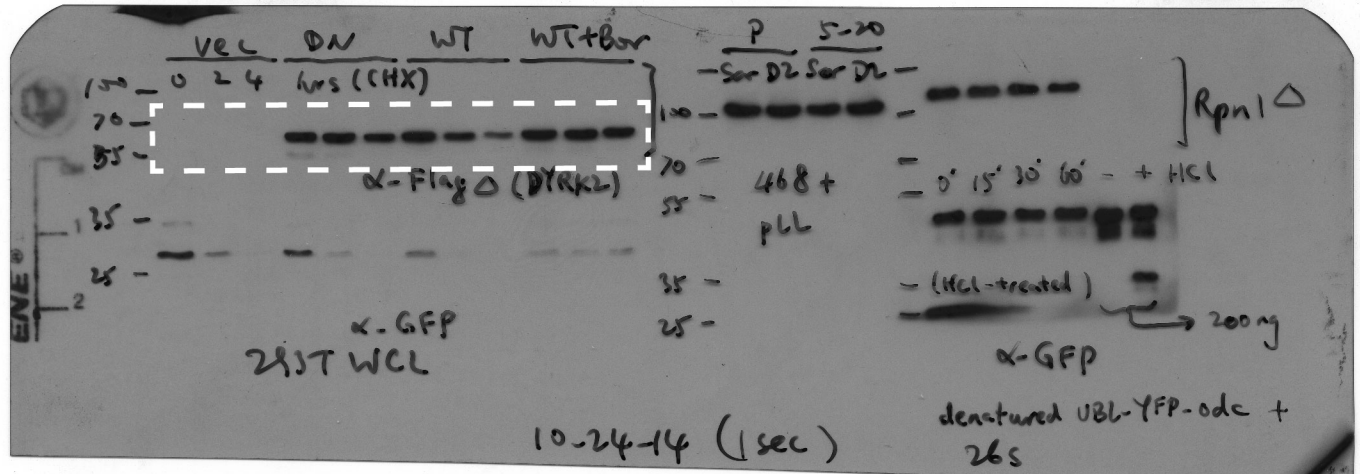



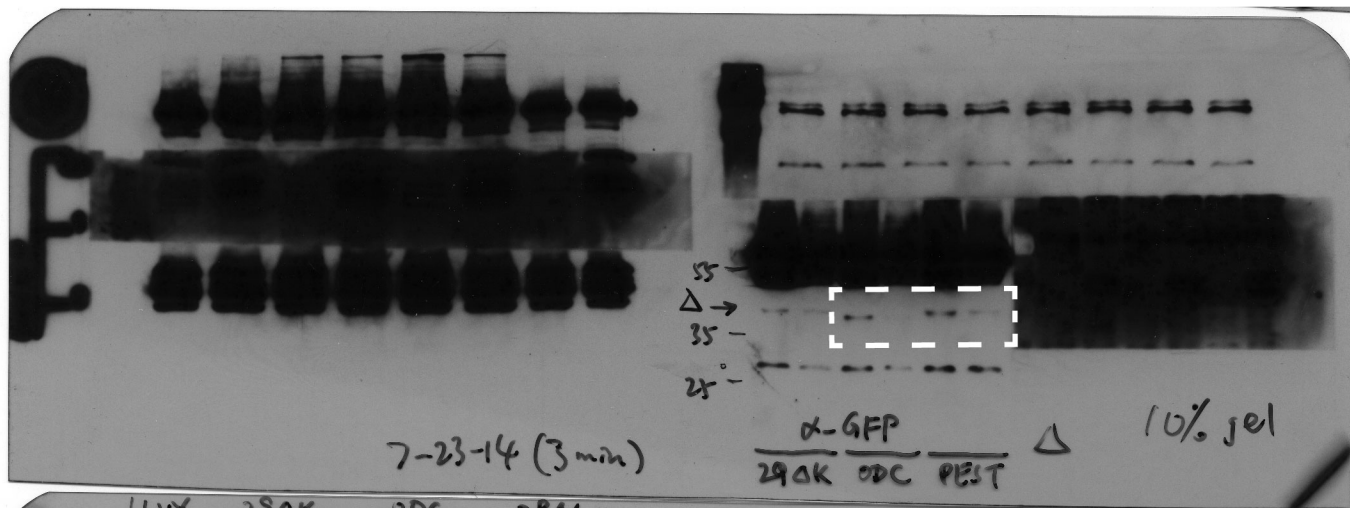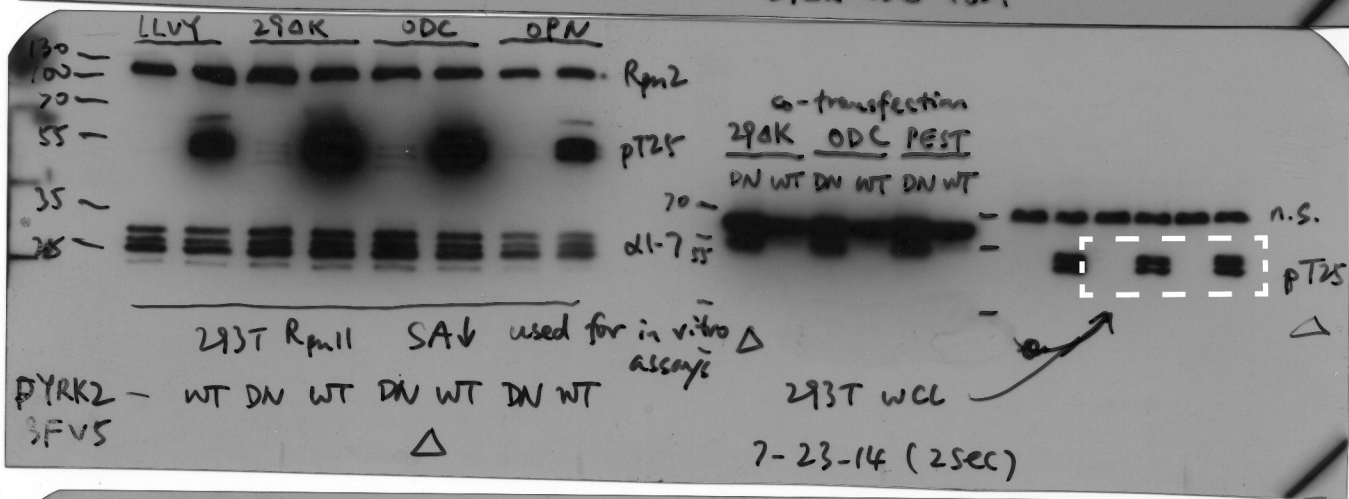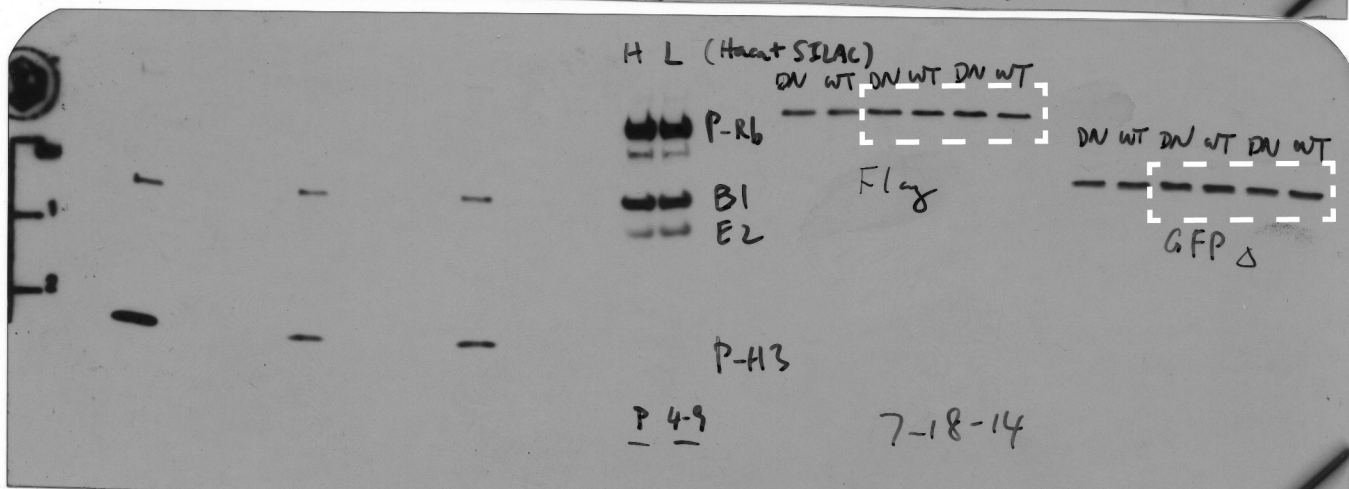

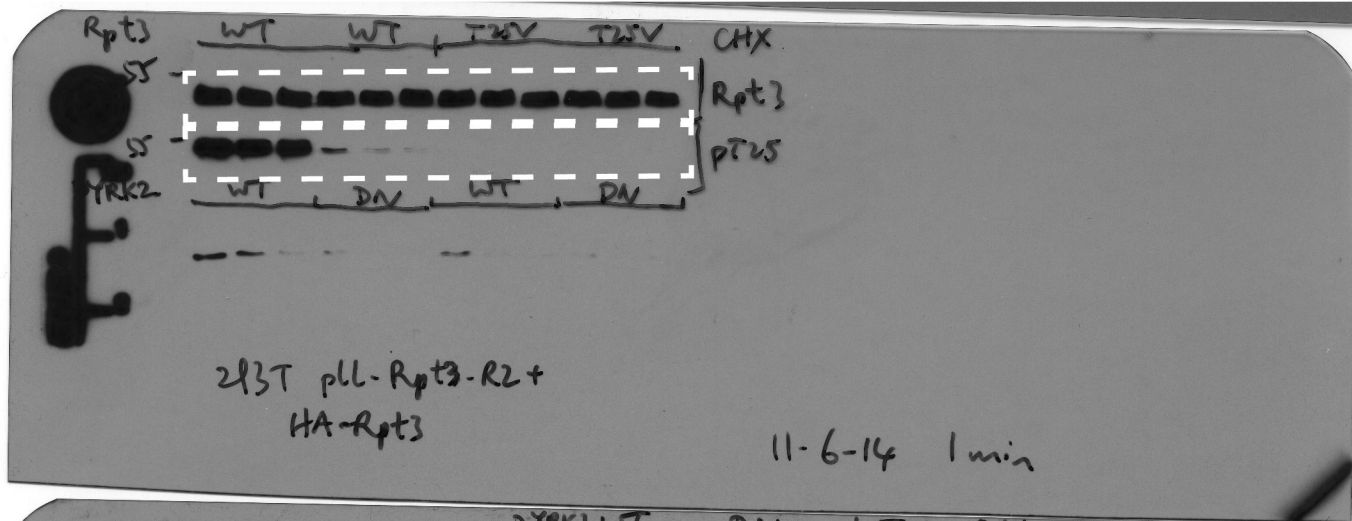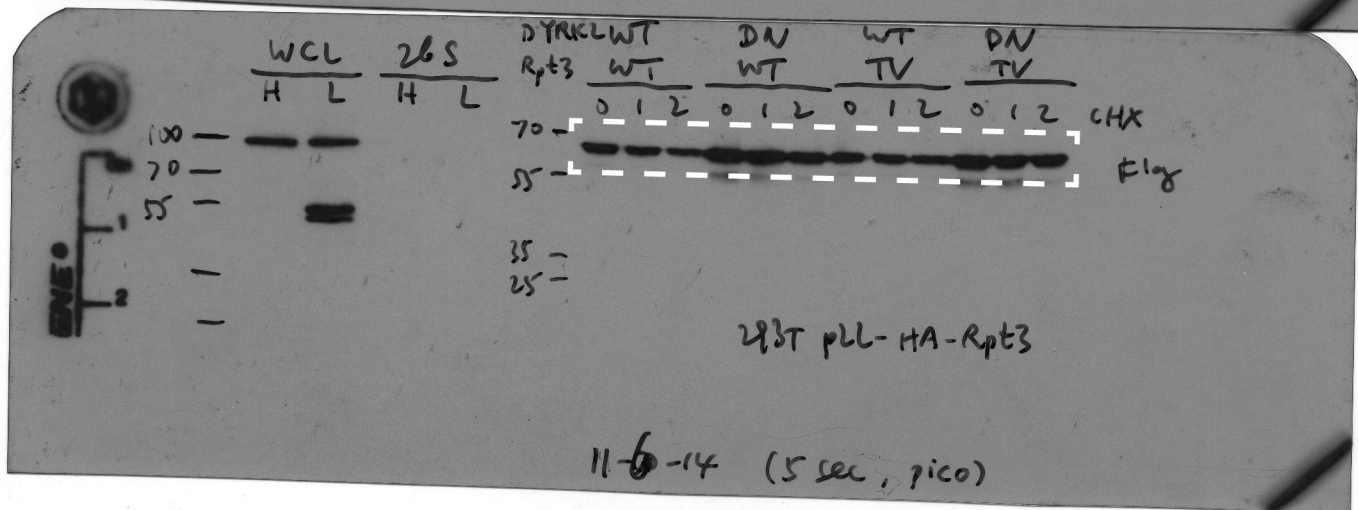

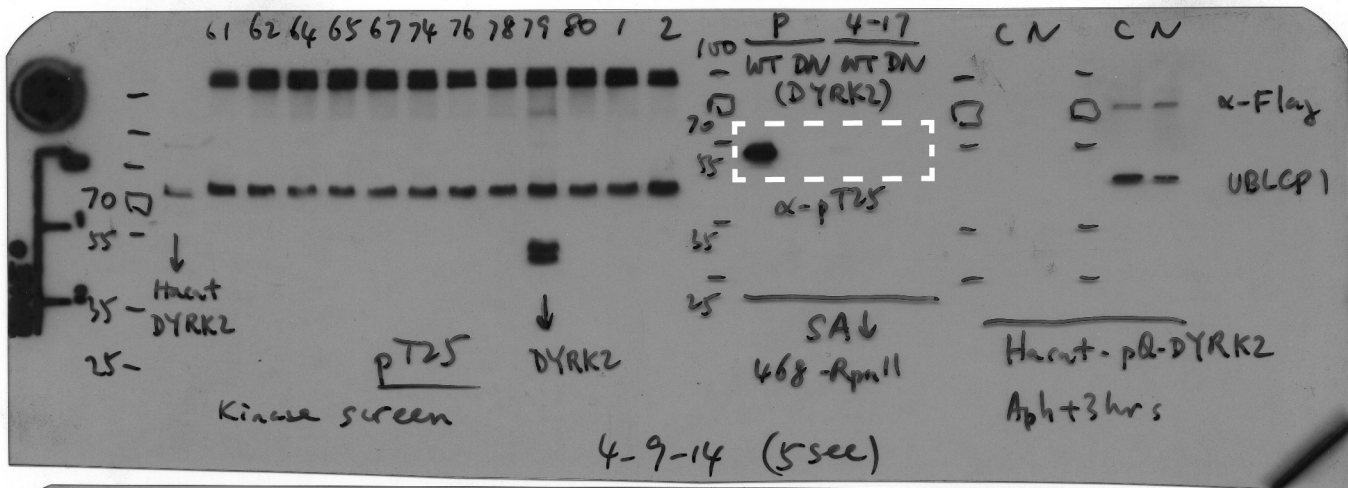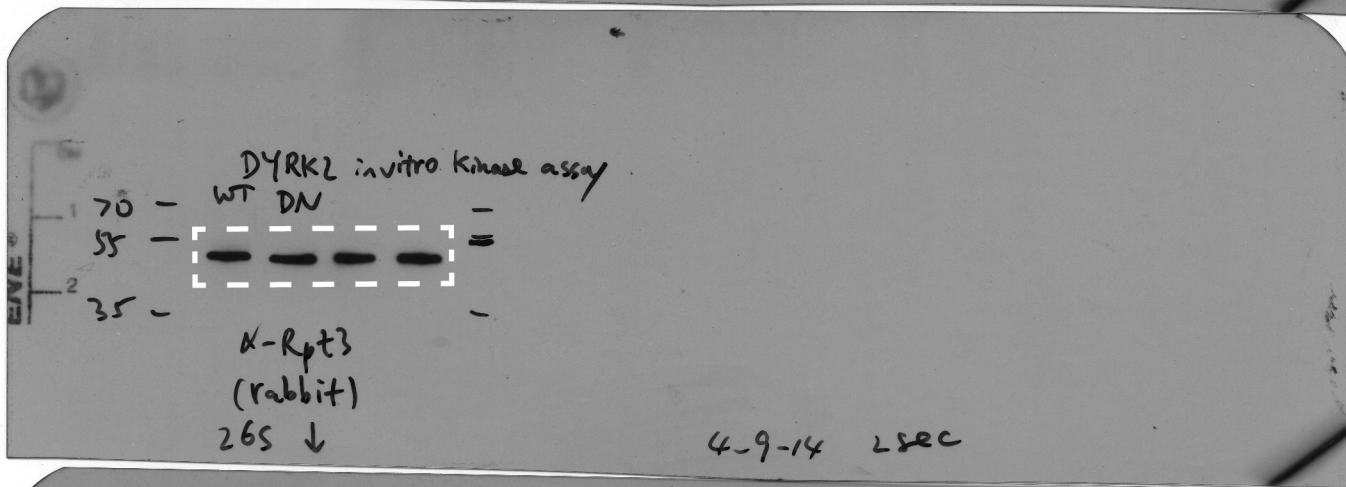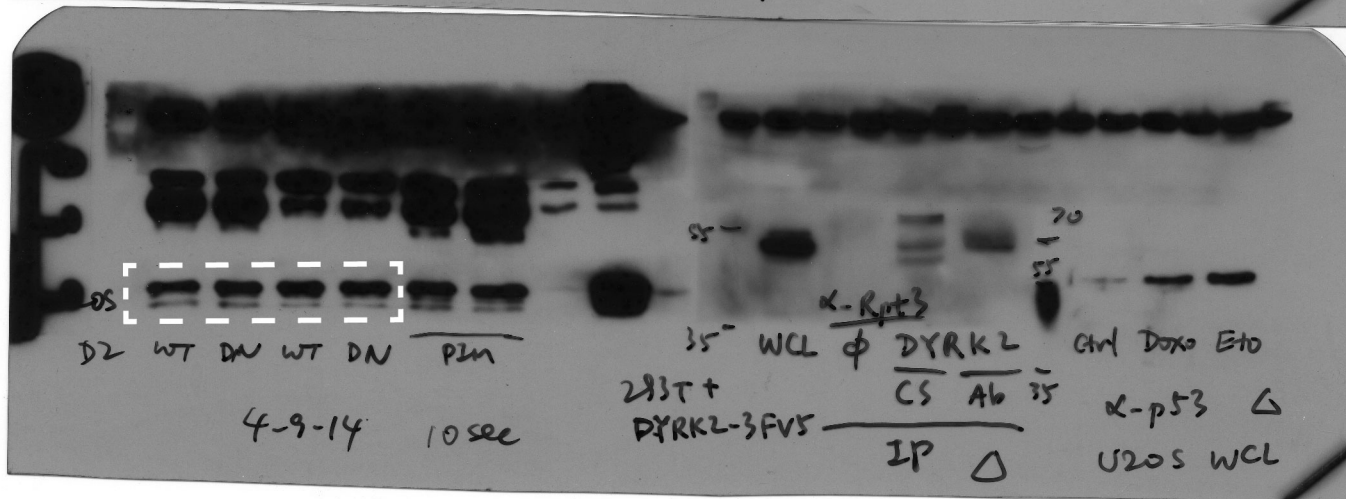

Blots for Fig.6b

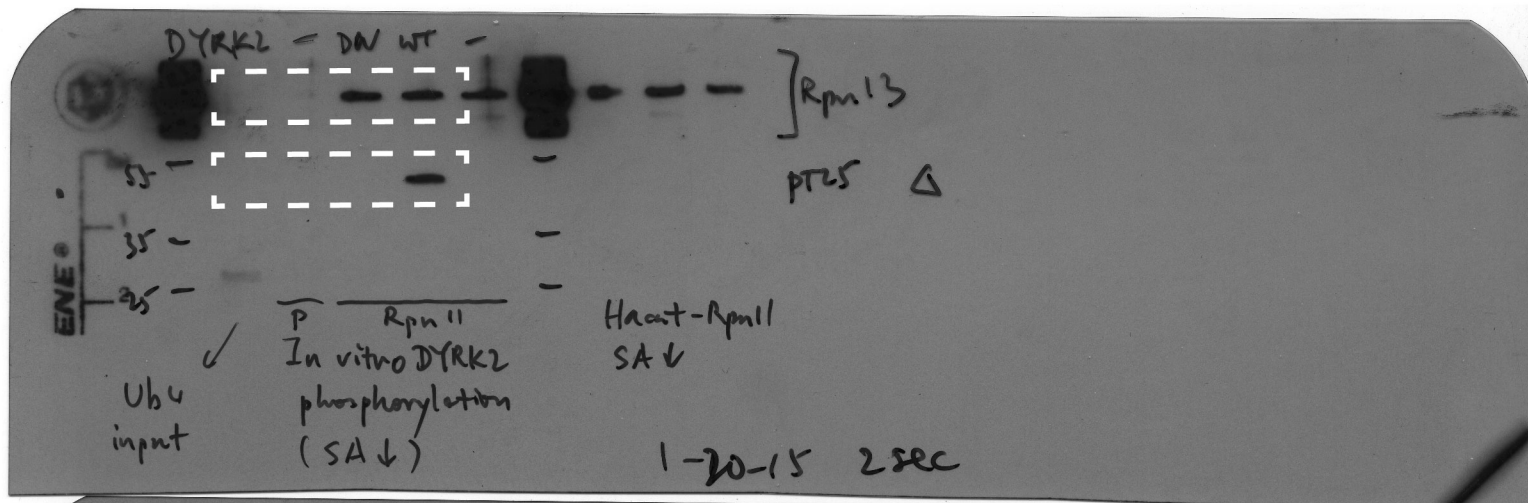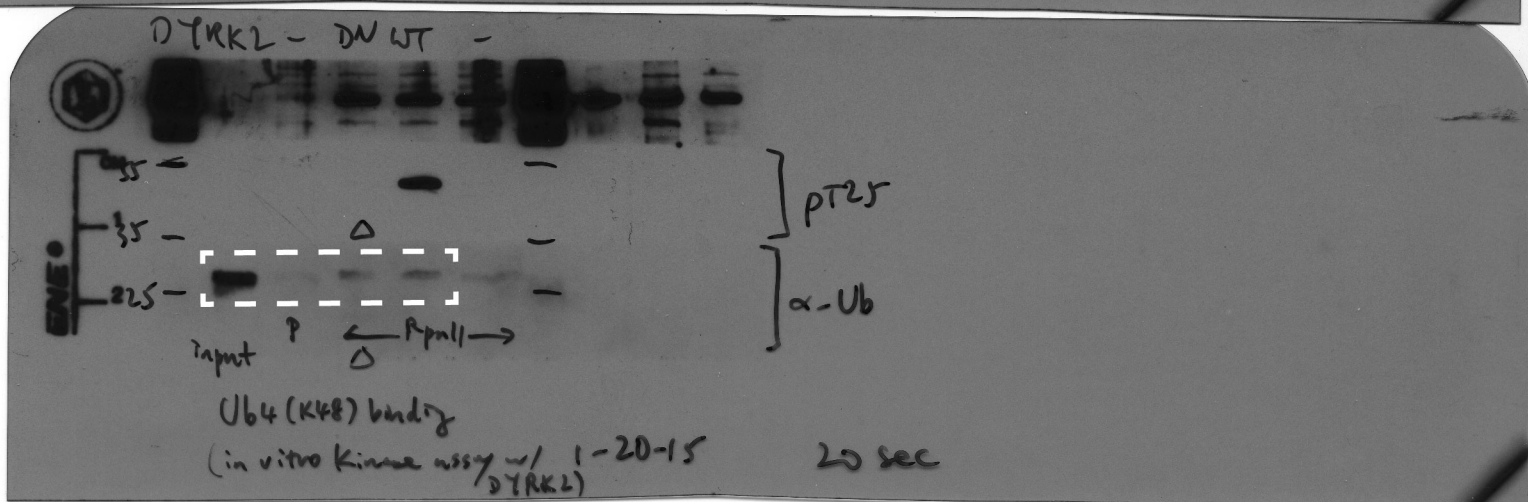

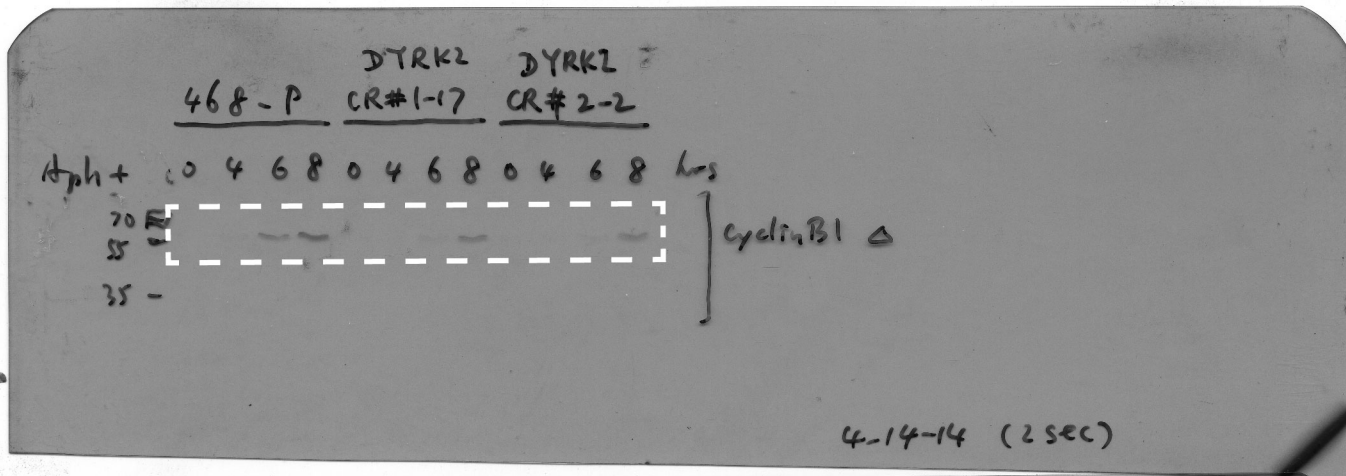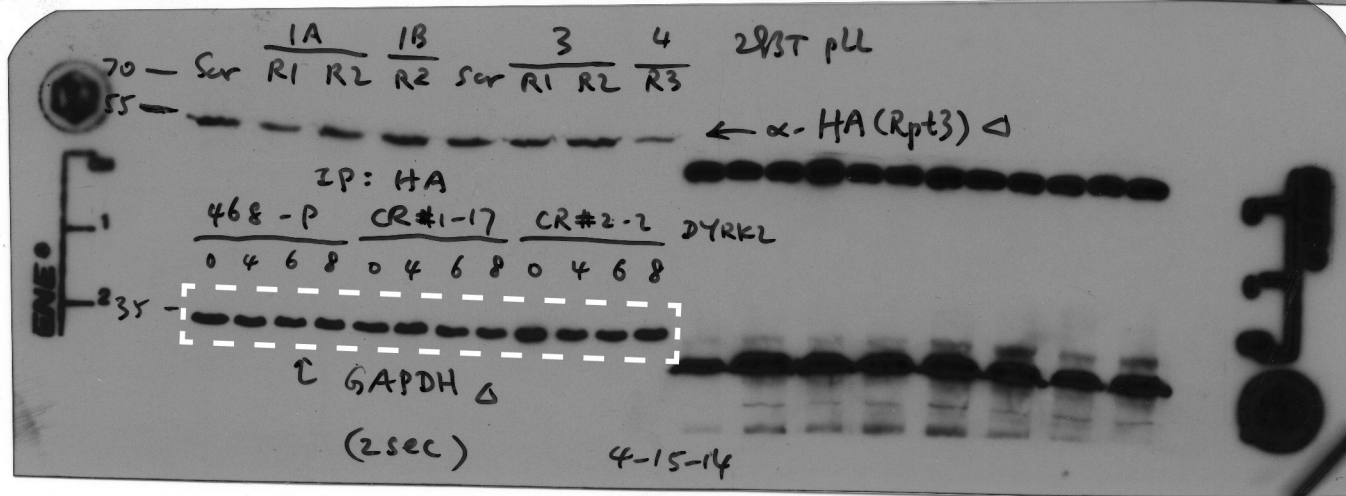

Blots for Fig.7d

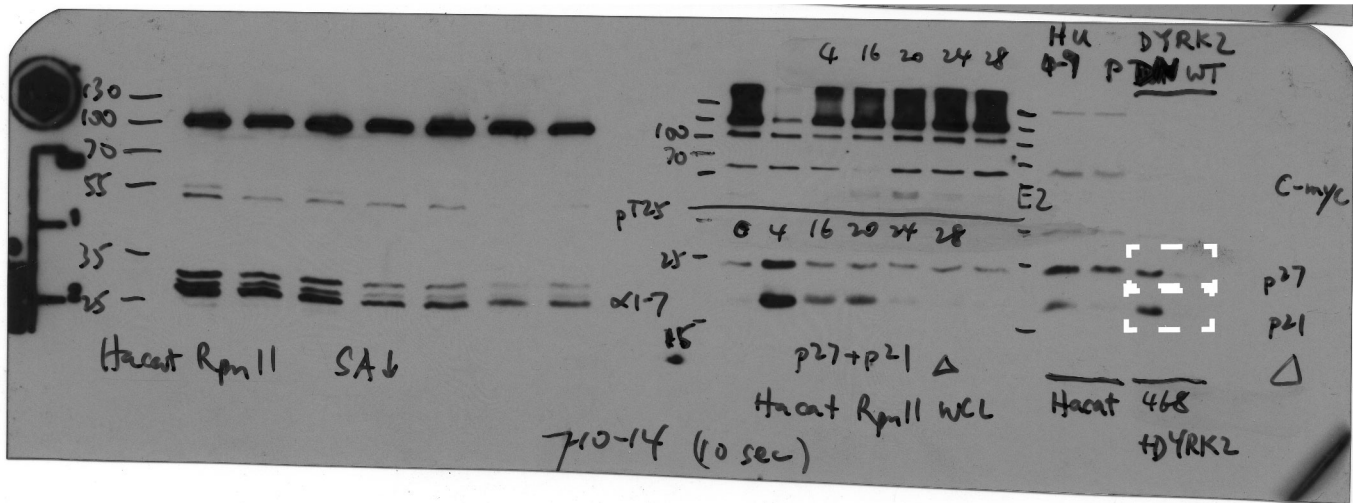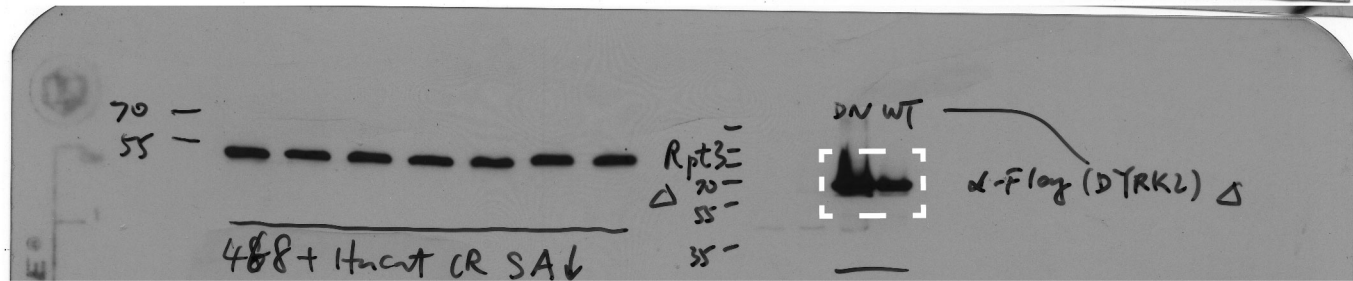

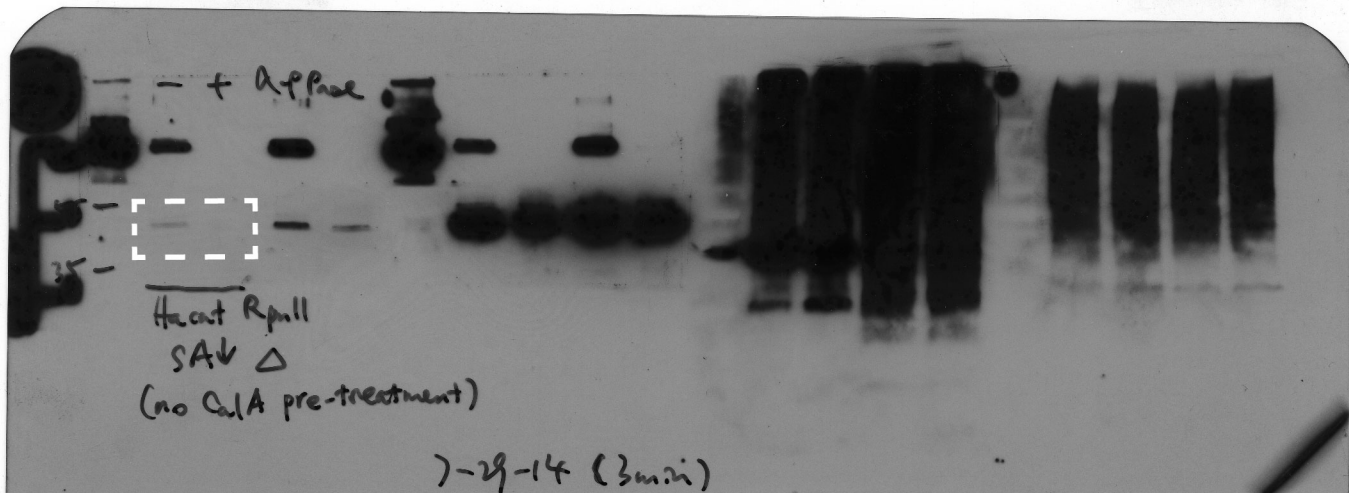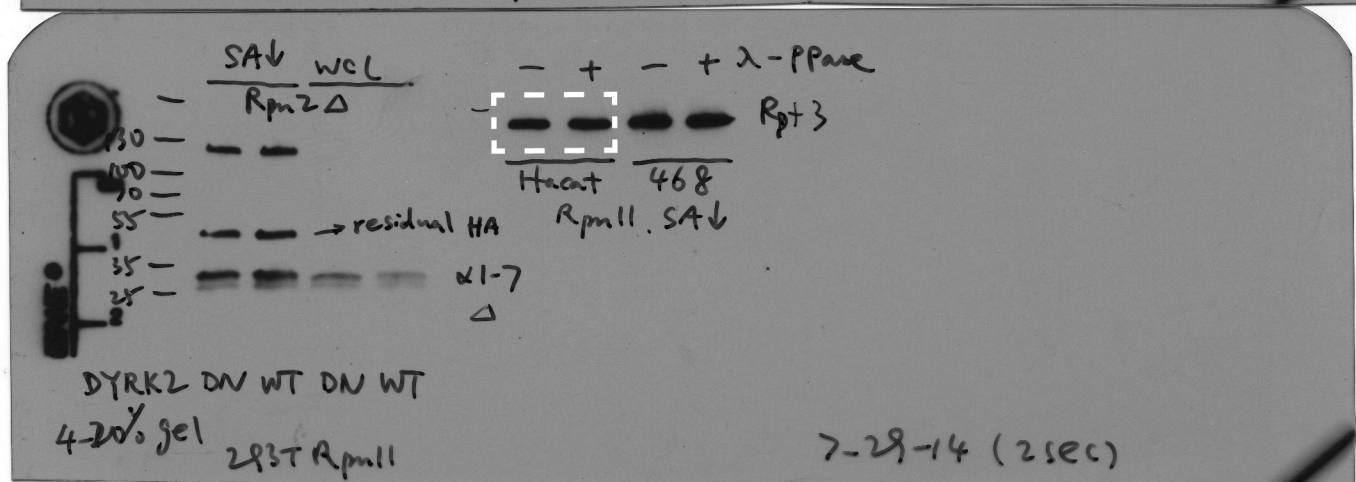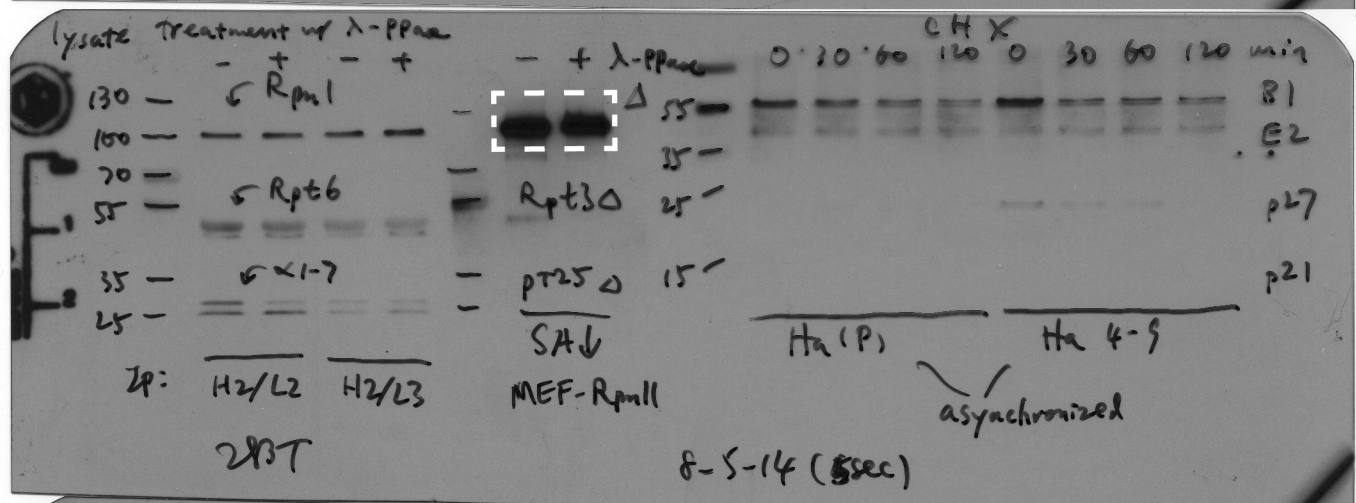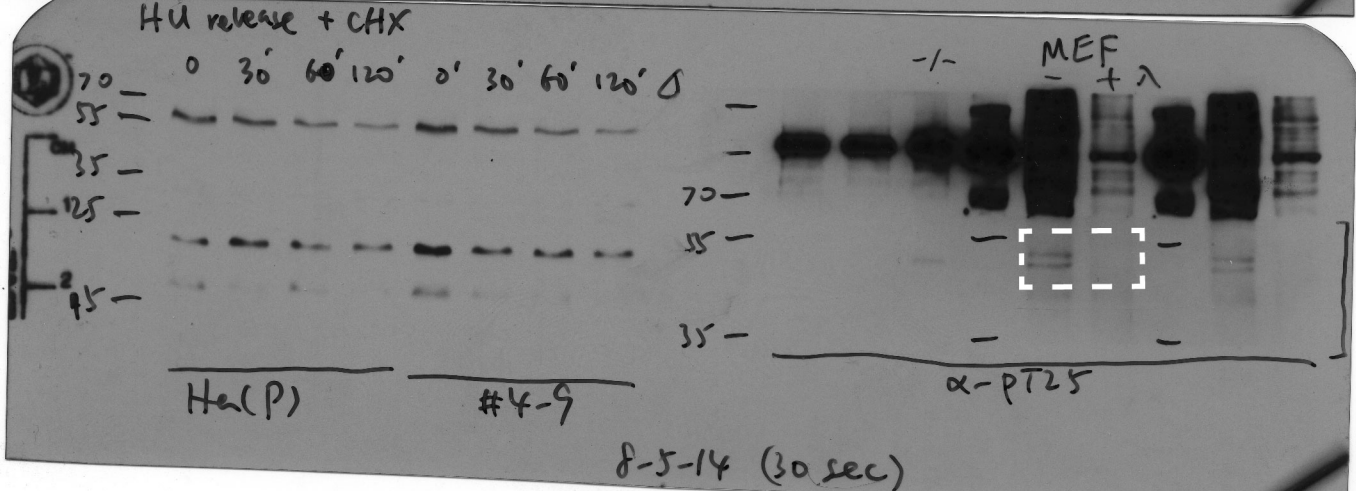

Blots for Supp Fig.1a-2

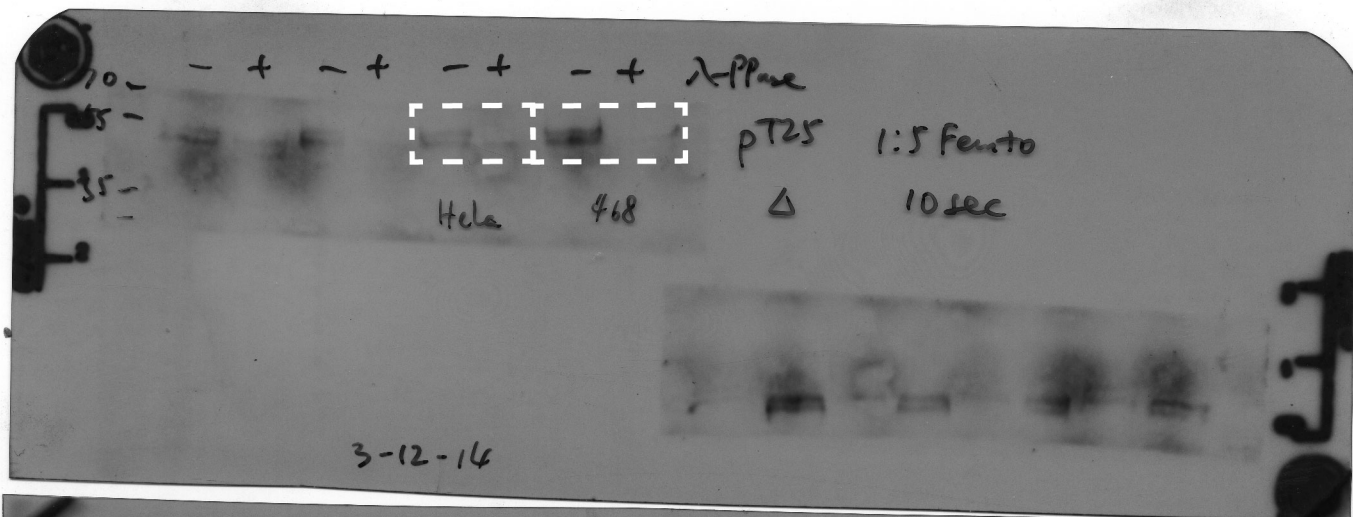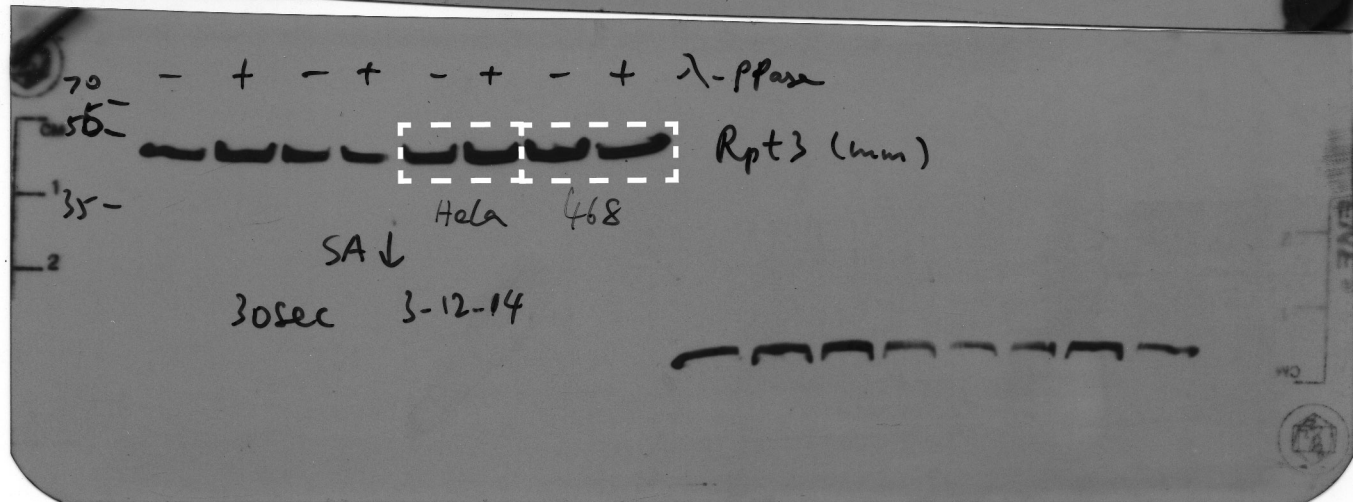



Blots for Supp Fig. 1b

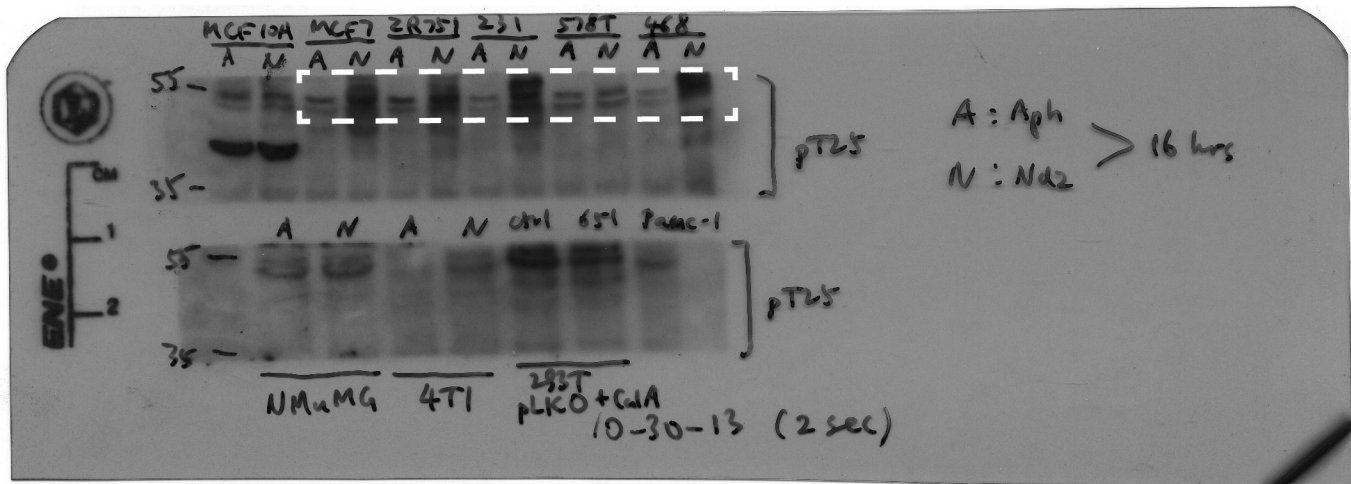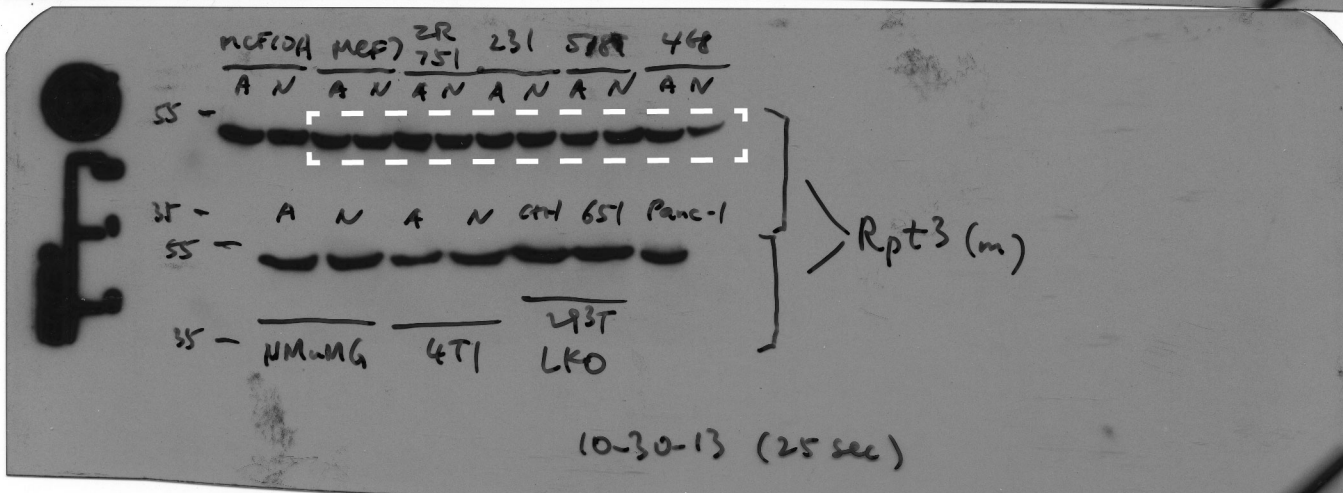

Blots for Supp Fig. 1c

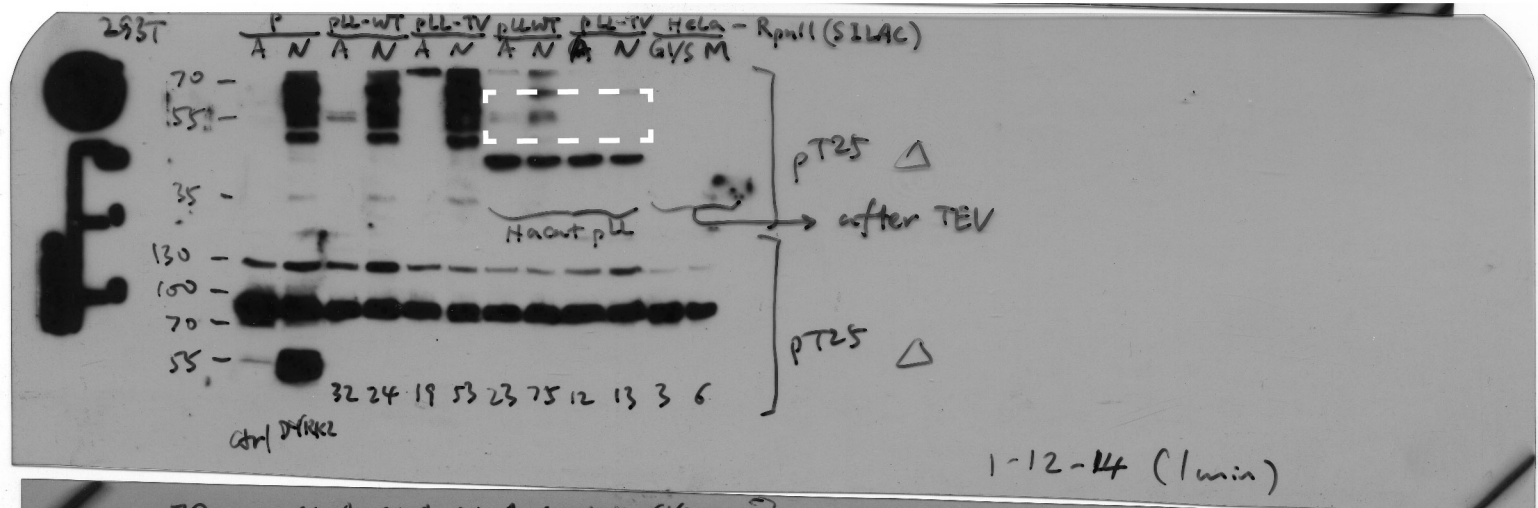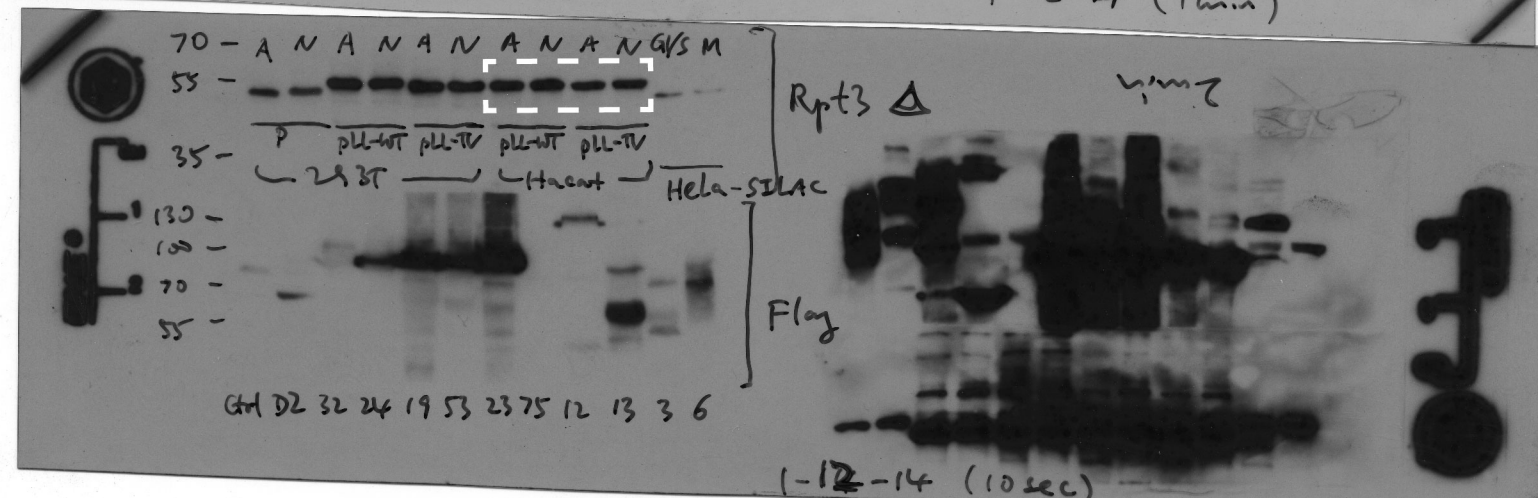

Blots for Supp Fig.1d

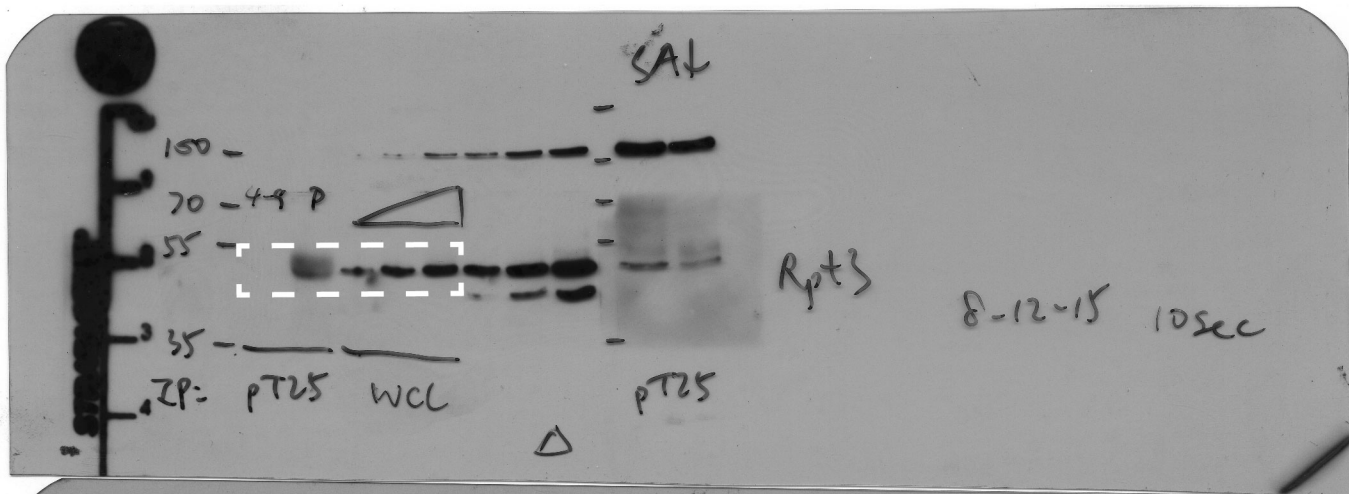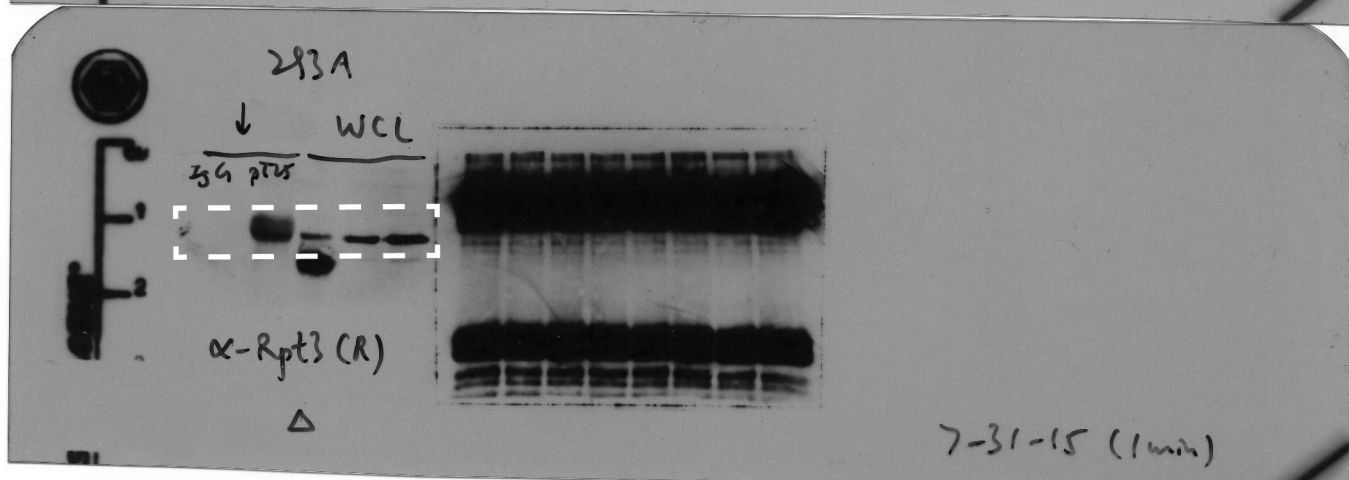

Blots for Supp Fig.2a

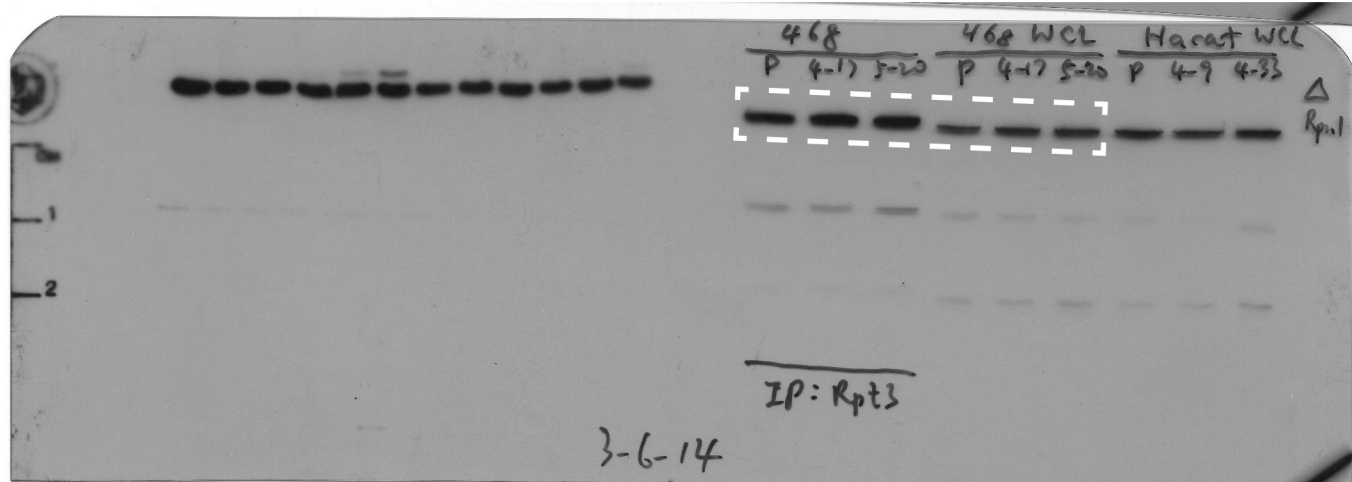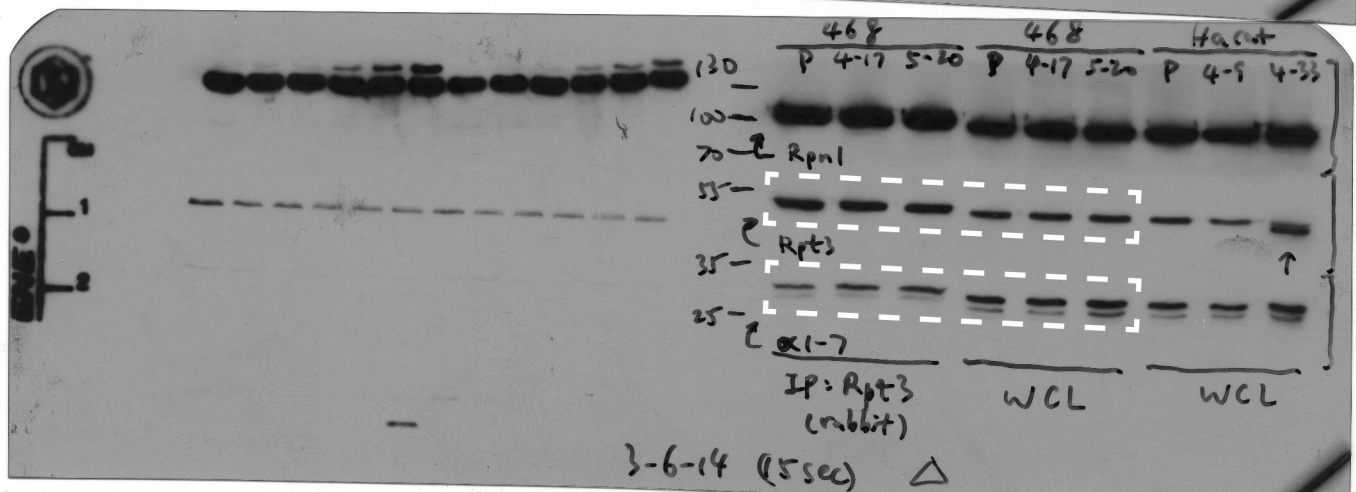

Blots for Supp Fig.2c

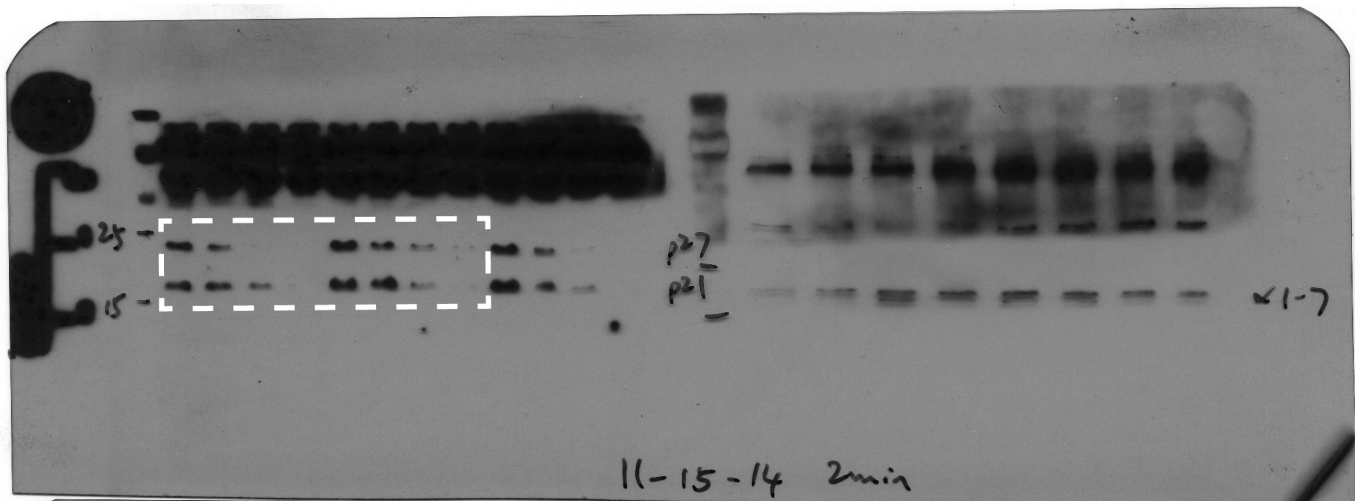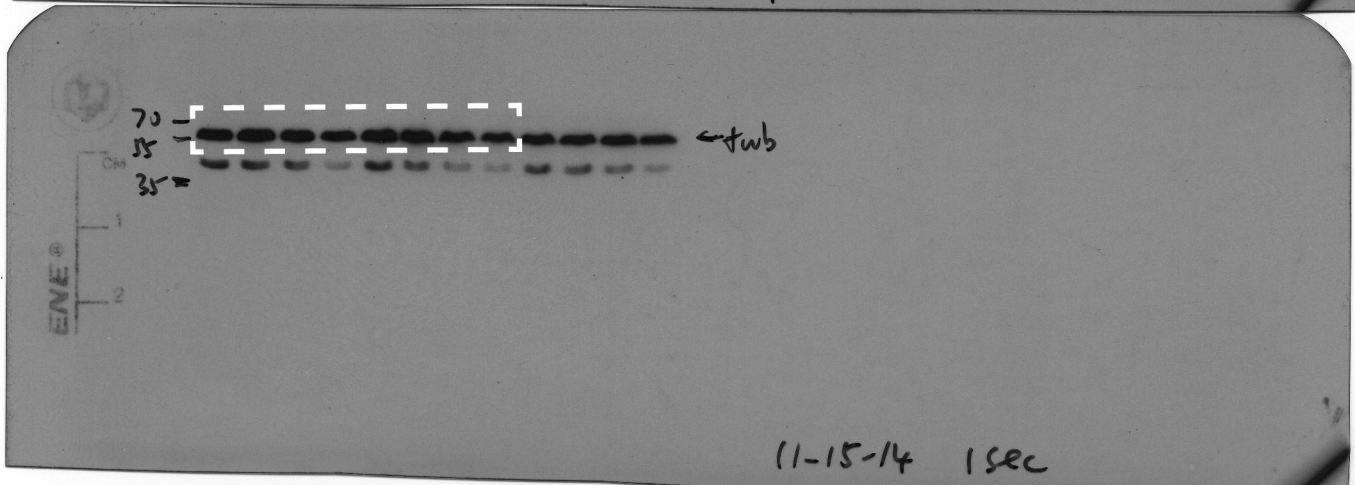

Blots for Supp Fig.2d

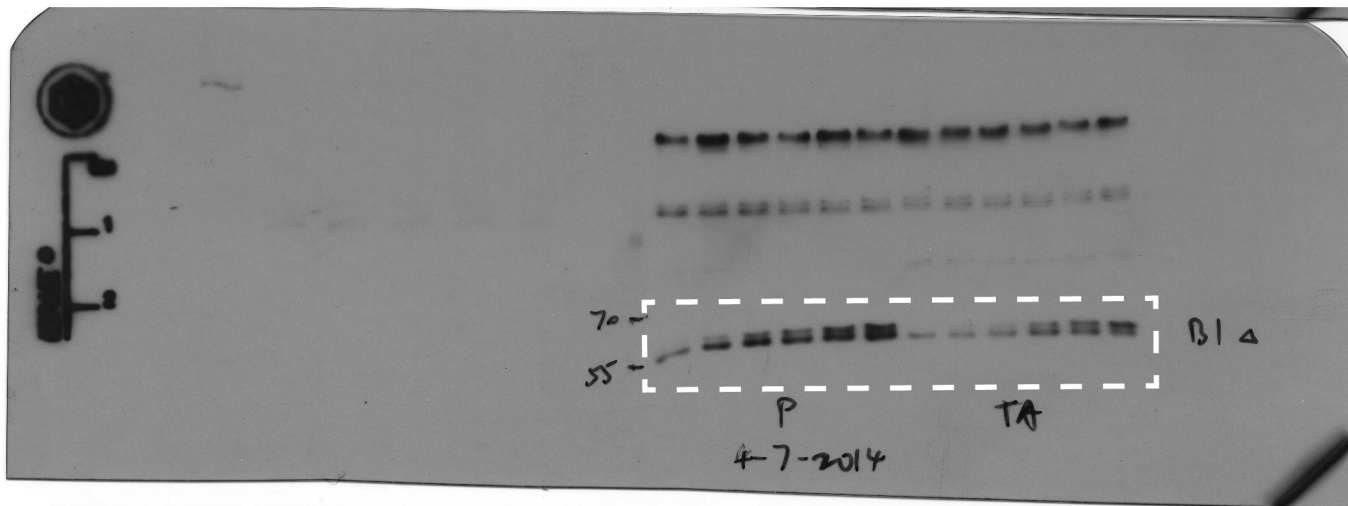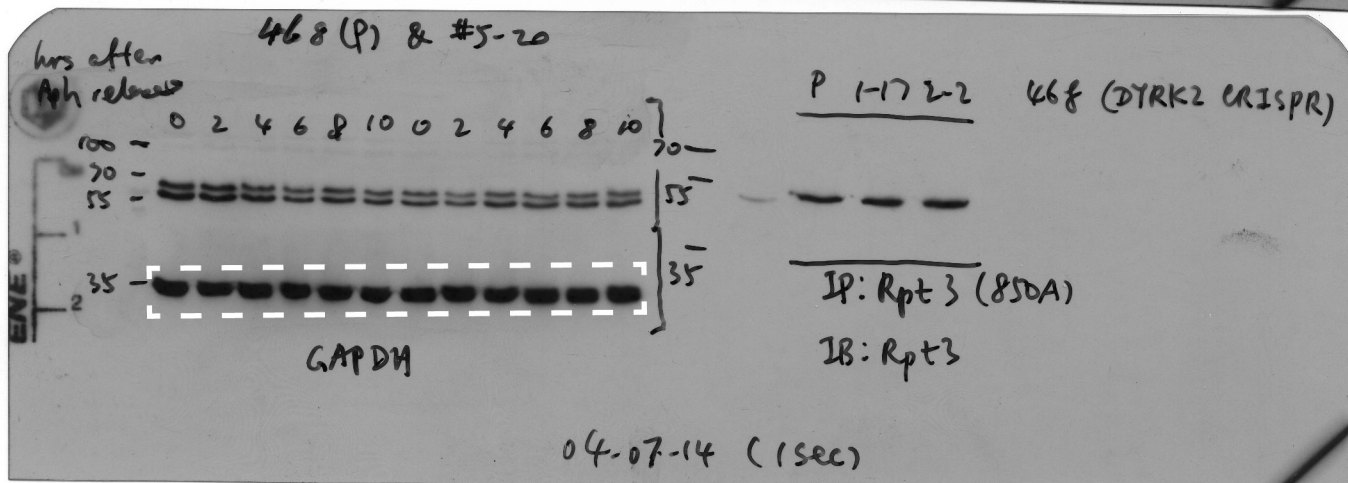

Blots for Supp Fig.2f

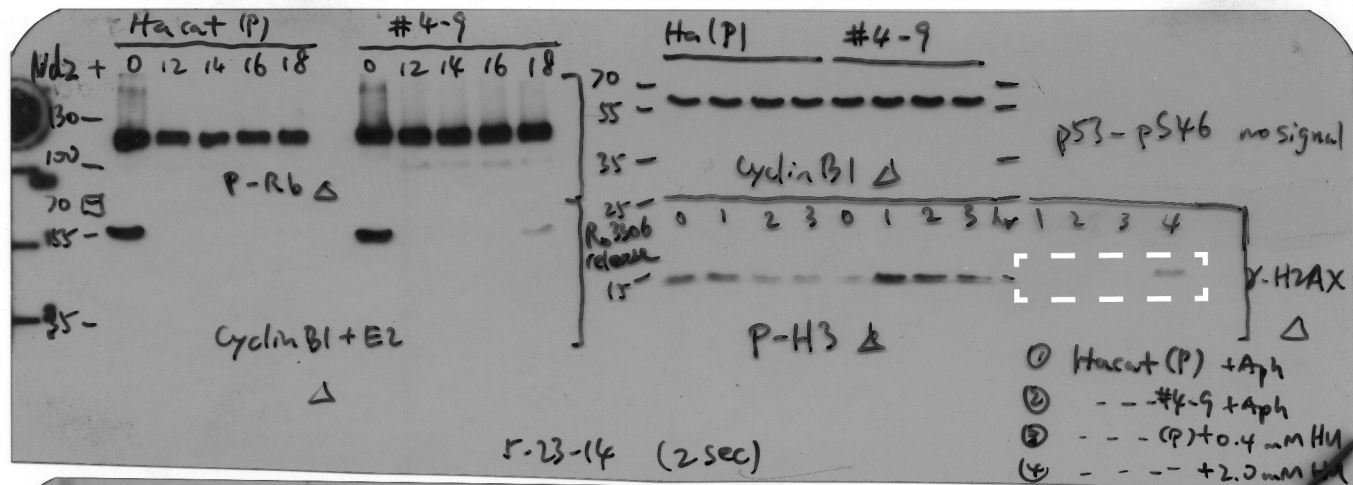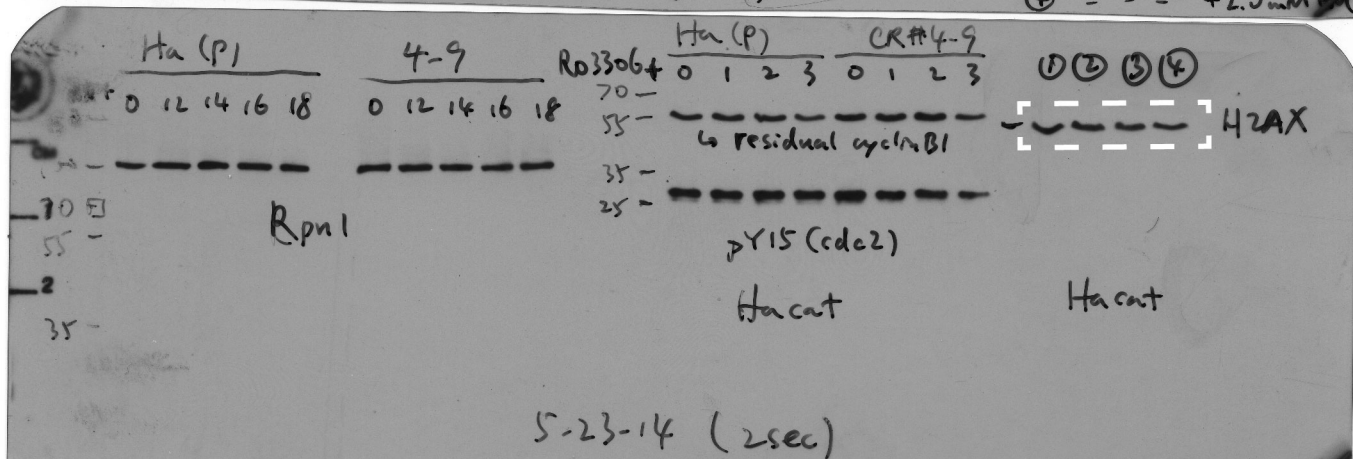

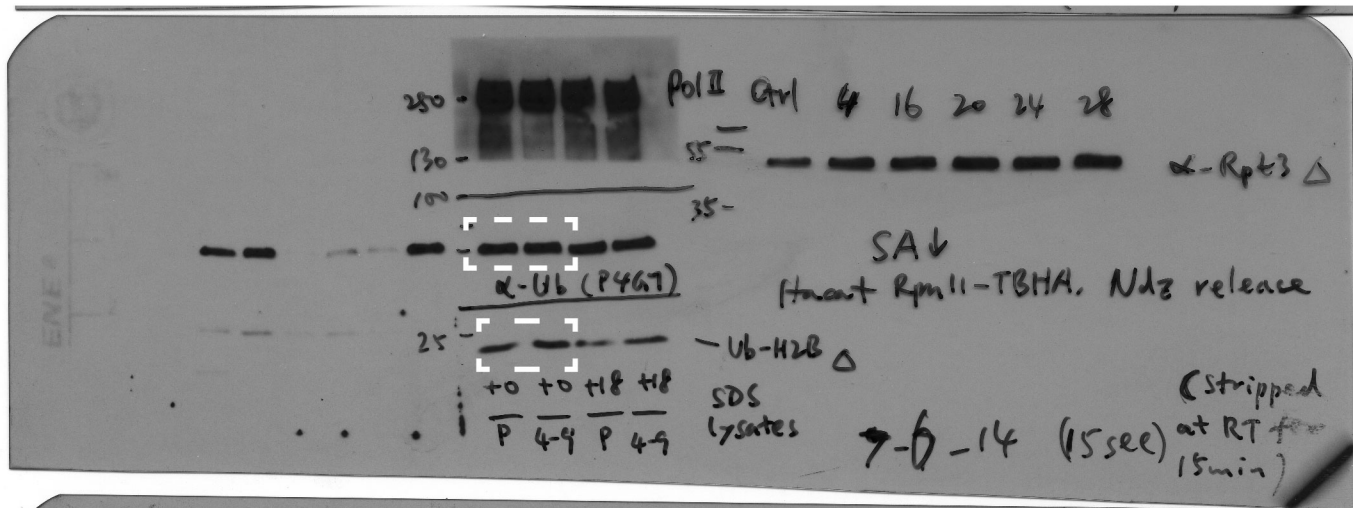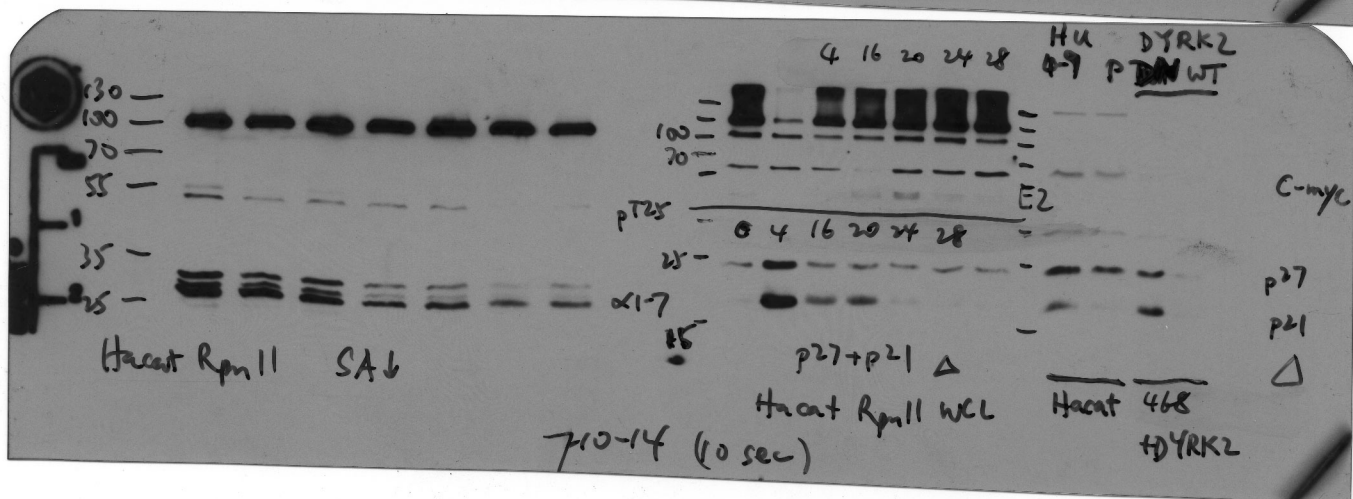



Blots for Supp Fig.3b

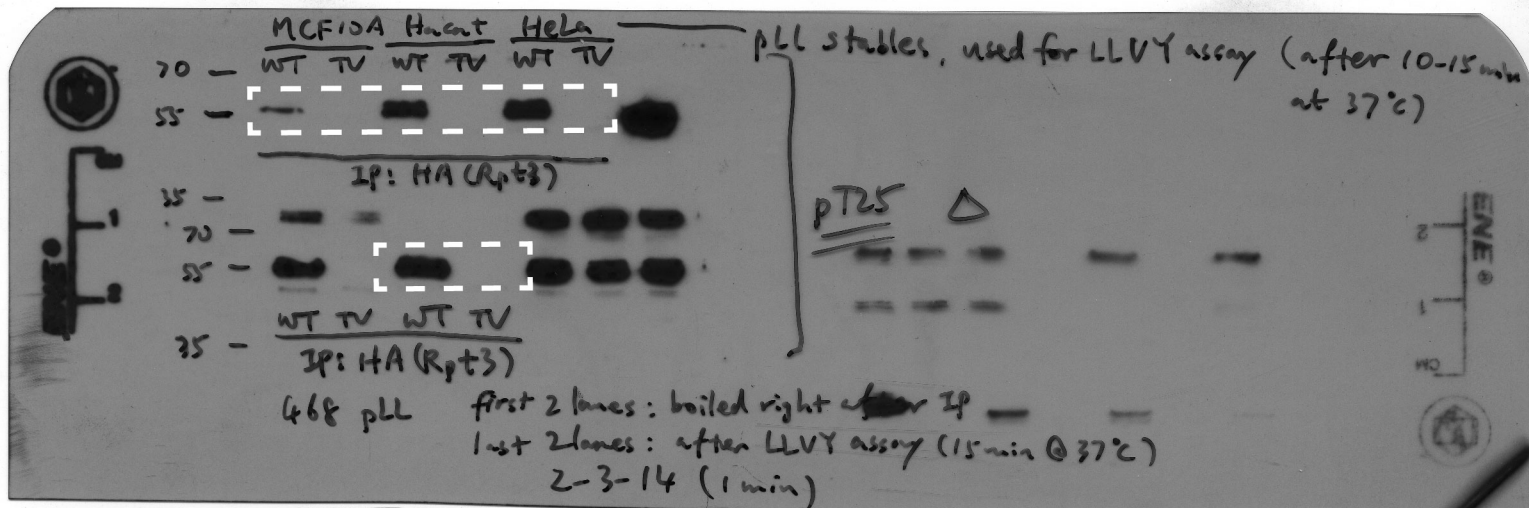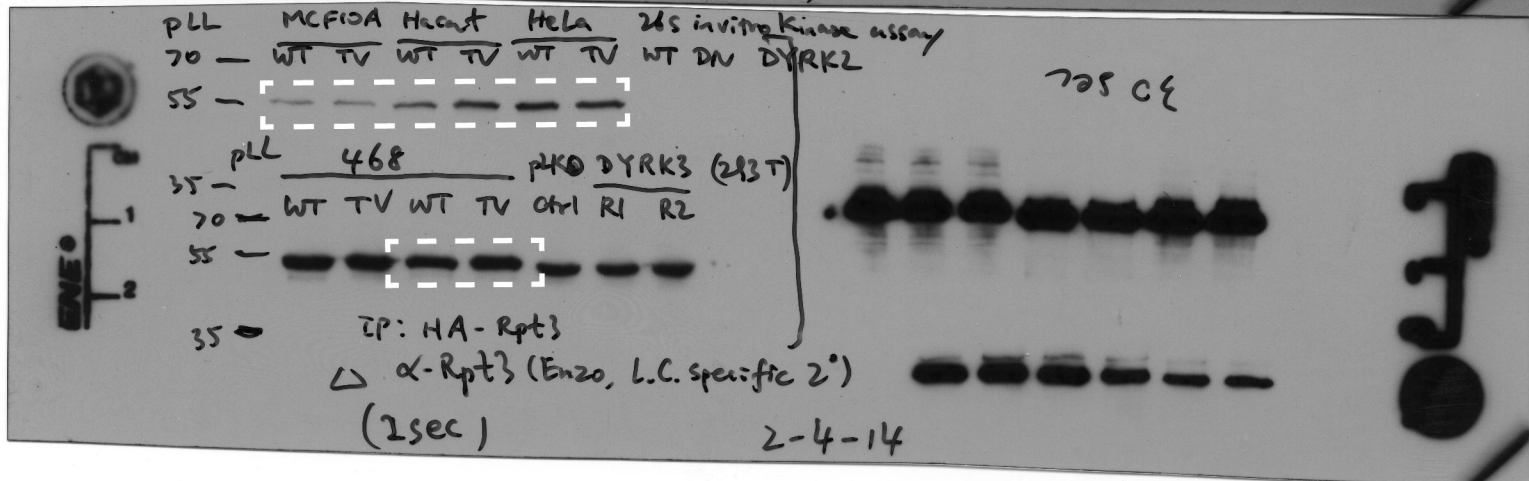

Blots for Supp Fig.4a

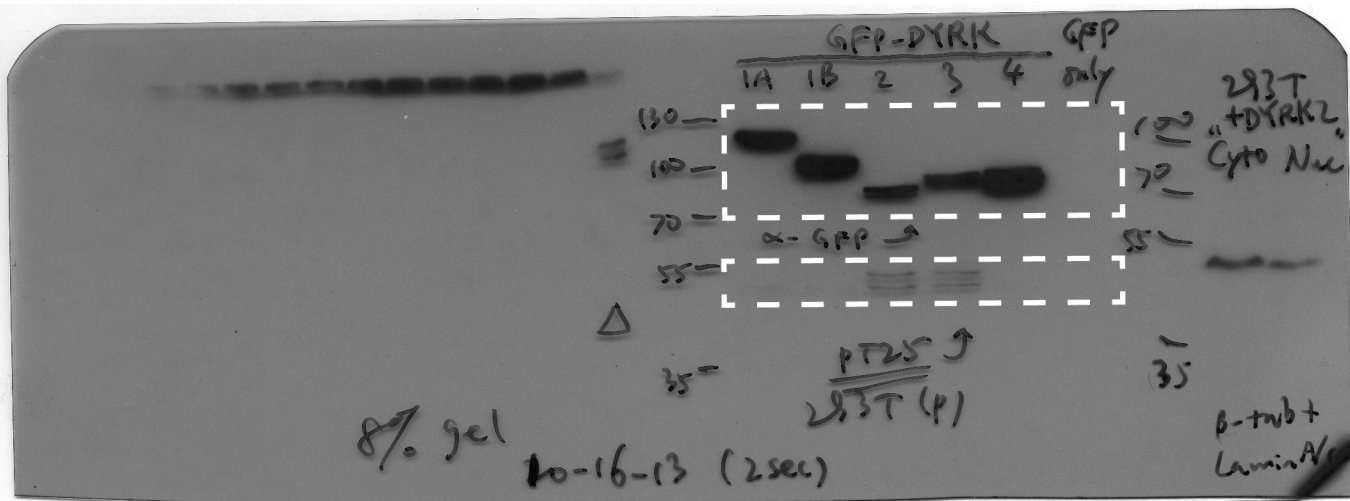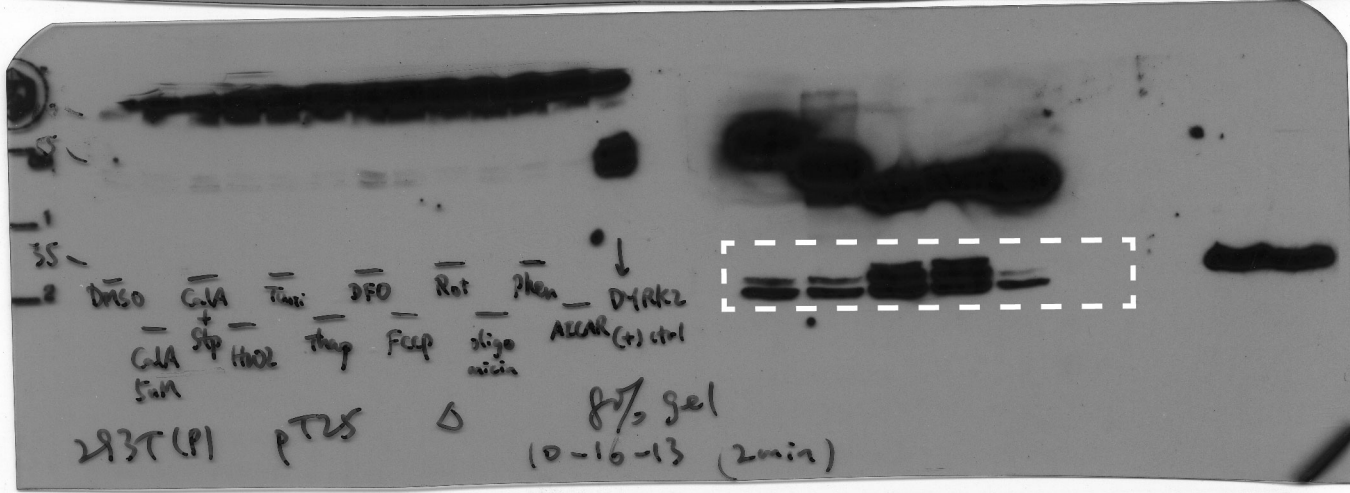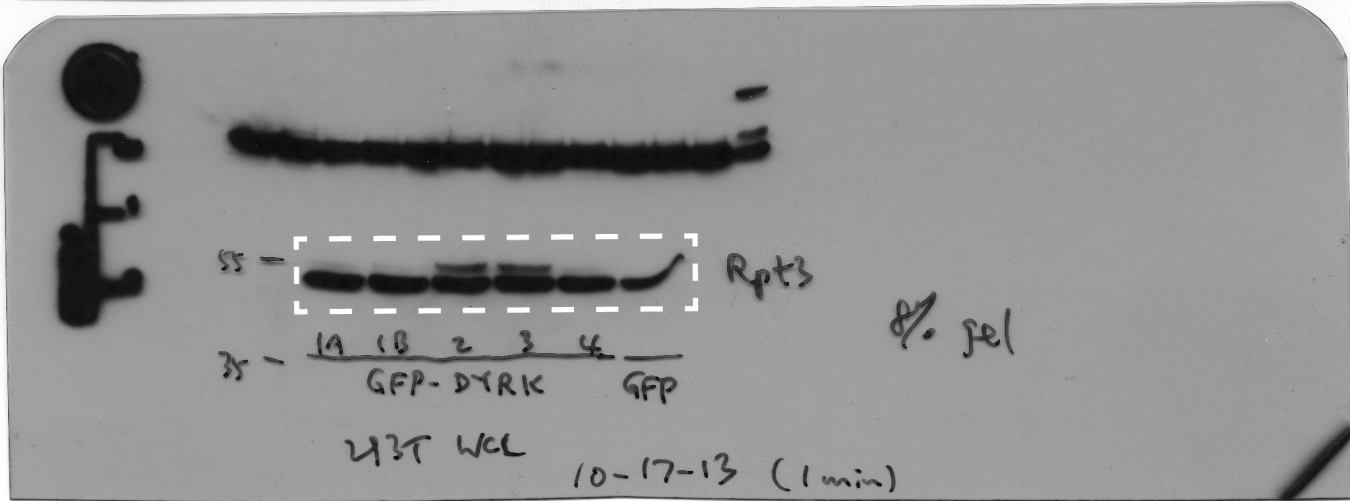

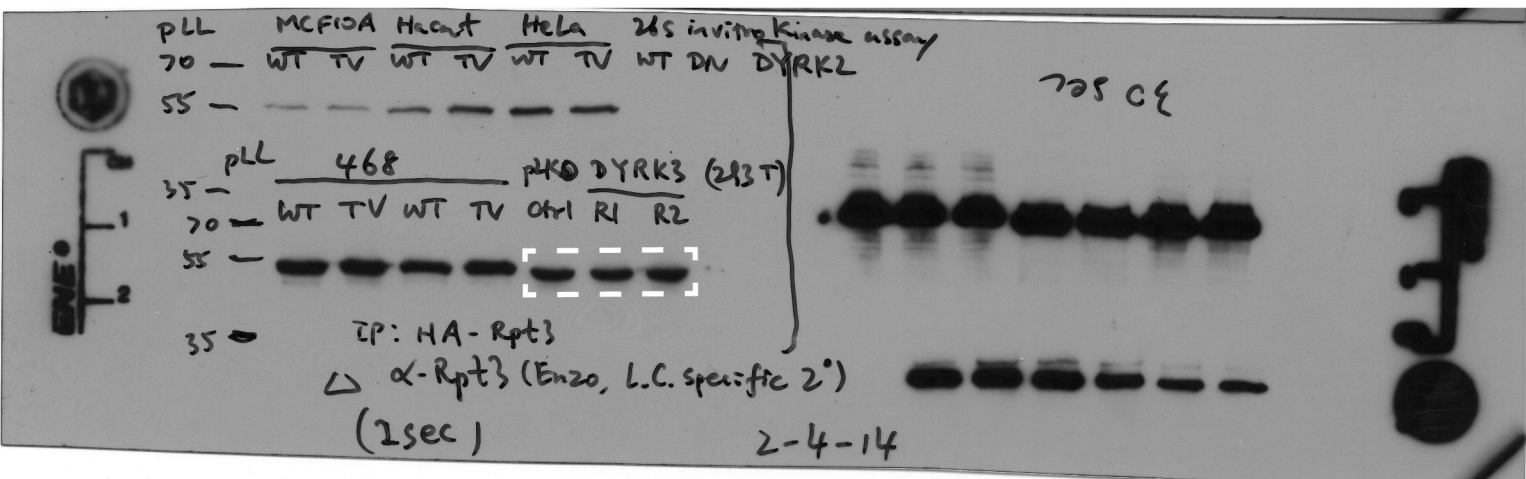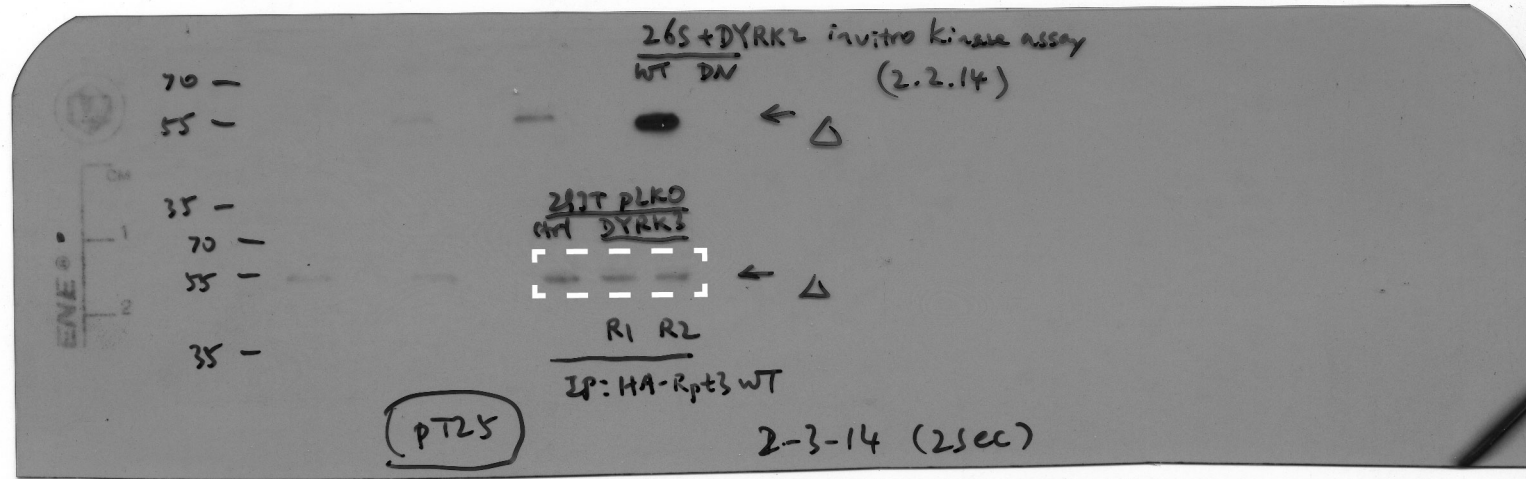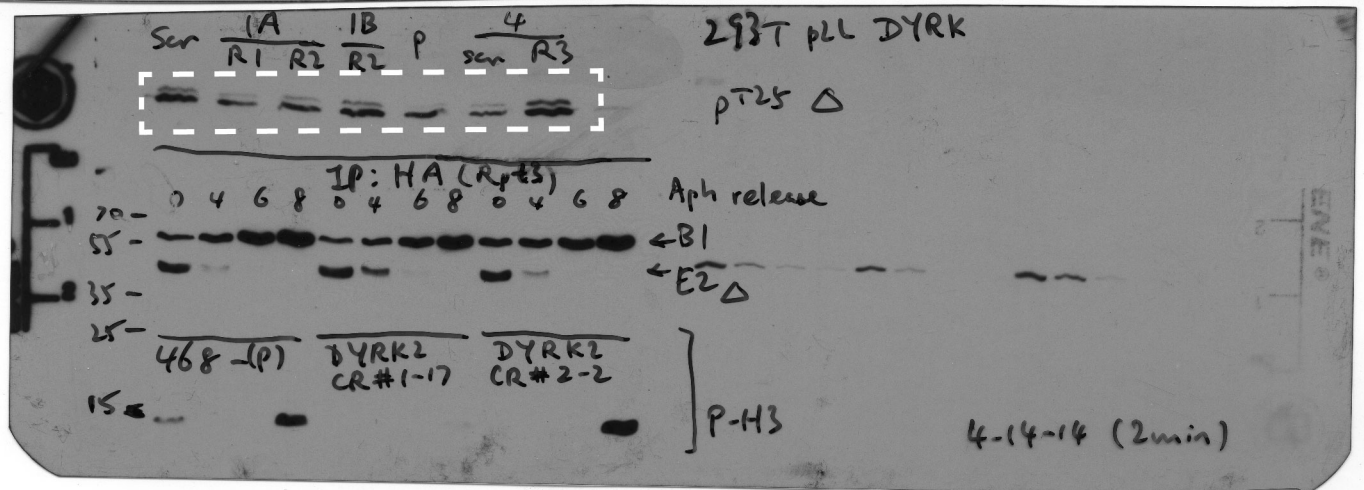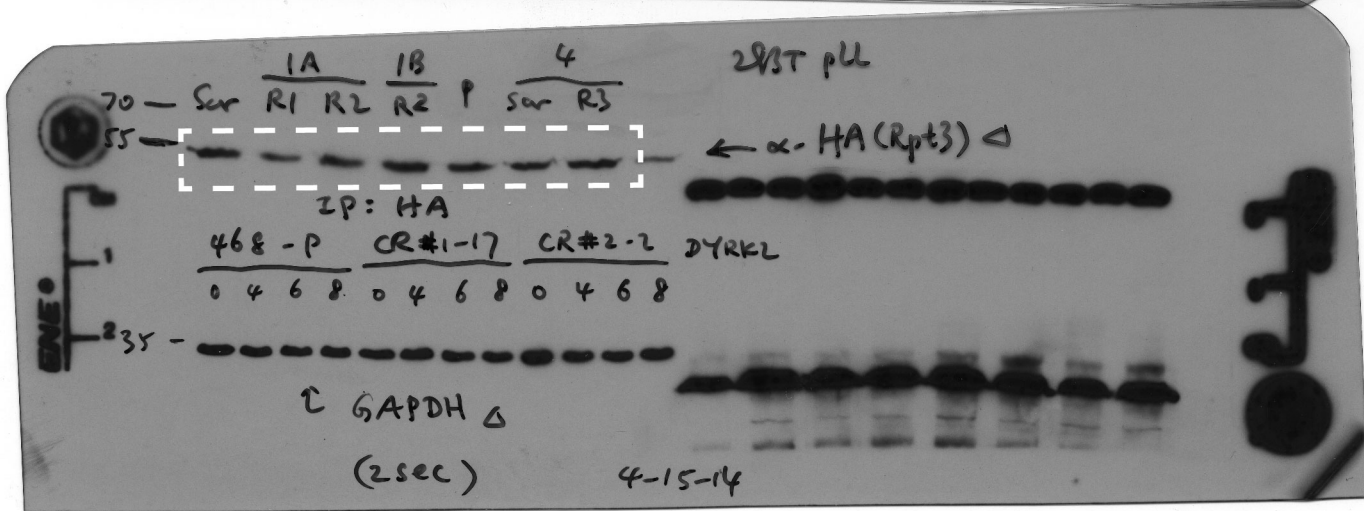

Blots for Supp Fig.4c

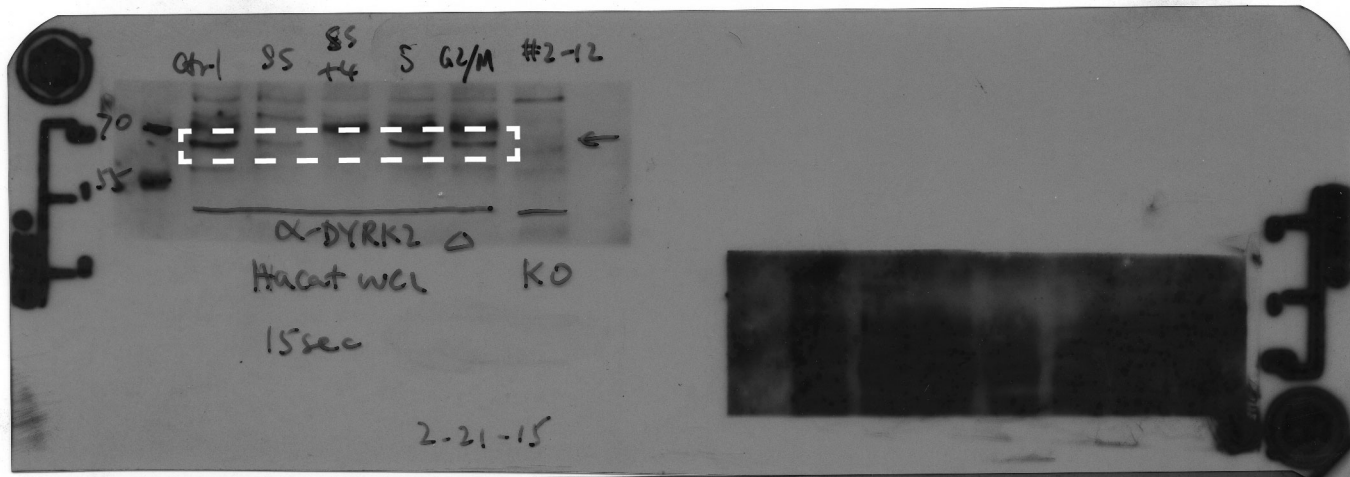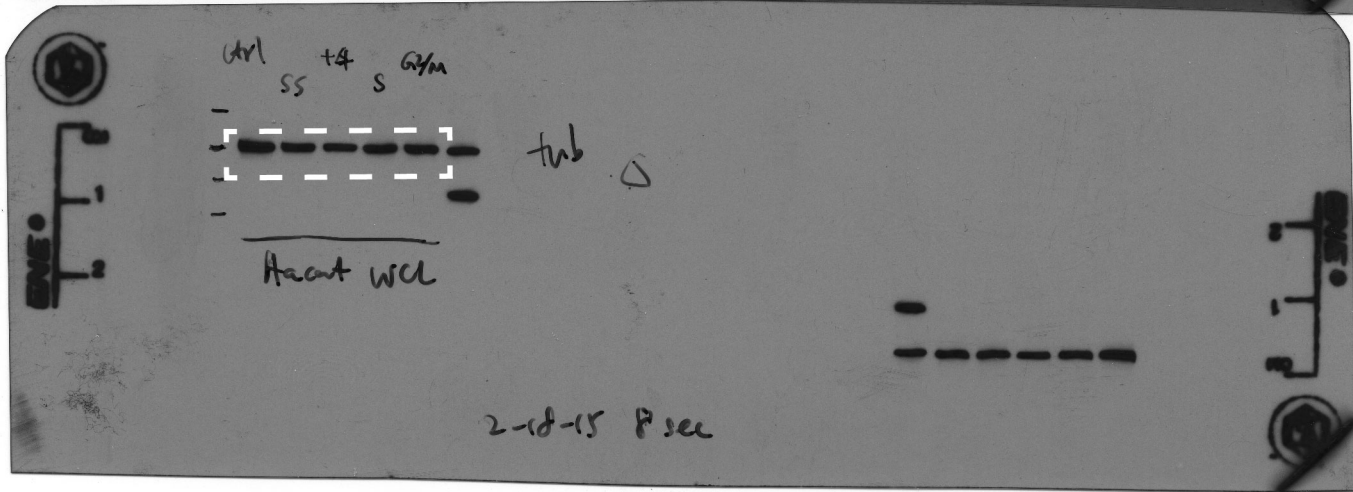

Blots for Supp Fig.5b

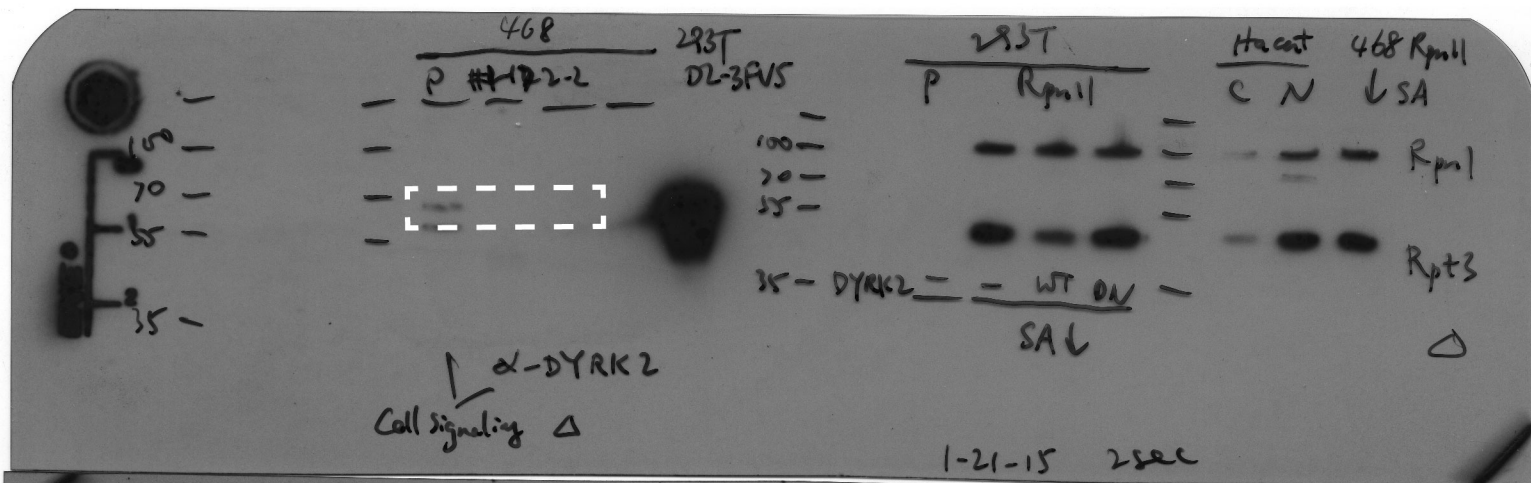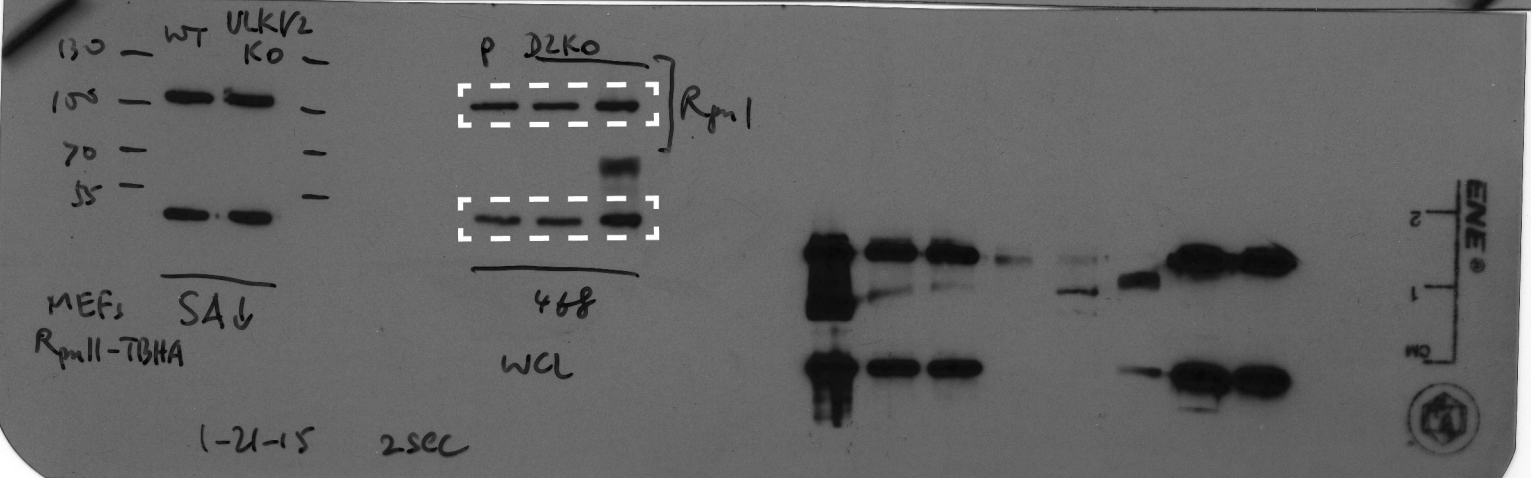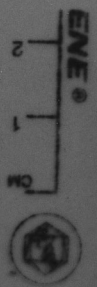

Supplement: NIHMS738062-supplement-supp_fig8.pdf [file NIHMS738062-supplement-supp_fig8.pdf]
